# Supplementary material for: Overexpression of the Phosphoserine Phosphatase-Encoding Gene (AtPSP1) Promotes Starch Accumulation in Lemna turionifera 5511 under Sulfur Deficiency
Source: MDPI journal article supplement (doi:10.3390/plants12051012), 2023-02-23
Supplement: s1 [file s1]

## Supplementary Materials

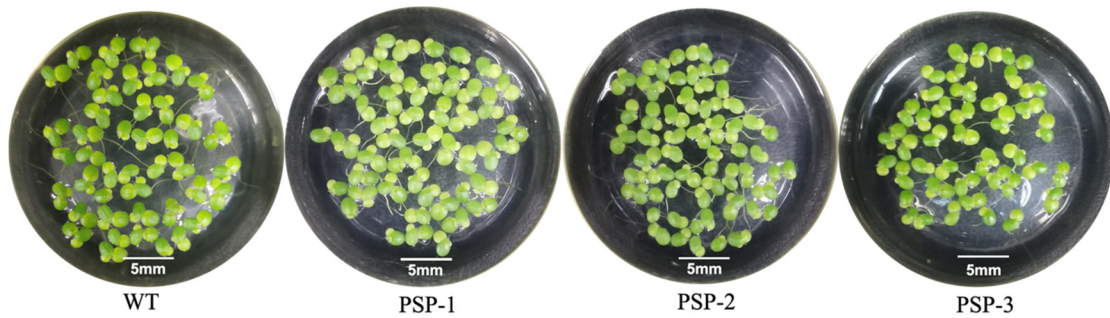

**Figure S1.** Phenotype of WT and three *AtPSP1* transgenic lines. The photos were taken after WT and *AtPSP1* transgenic lines were cultivated after full nutrition condition (Datko) for 9 days.

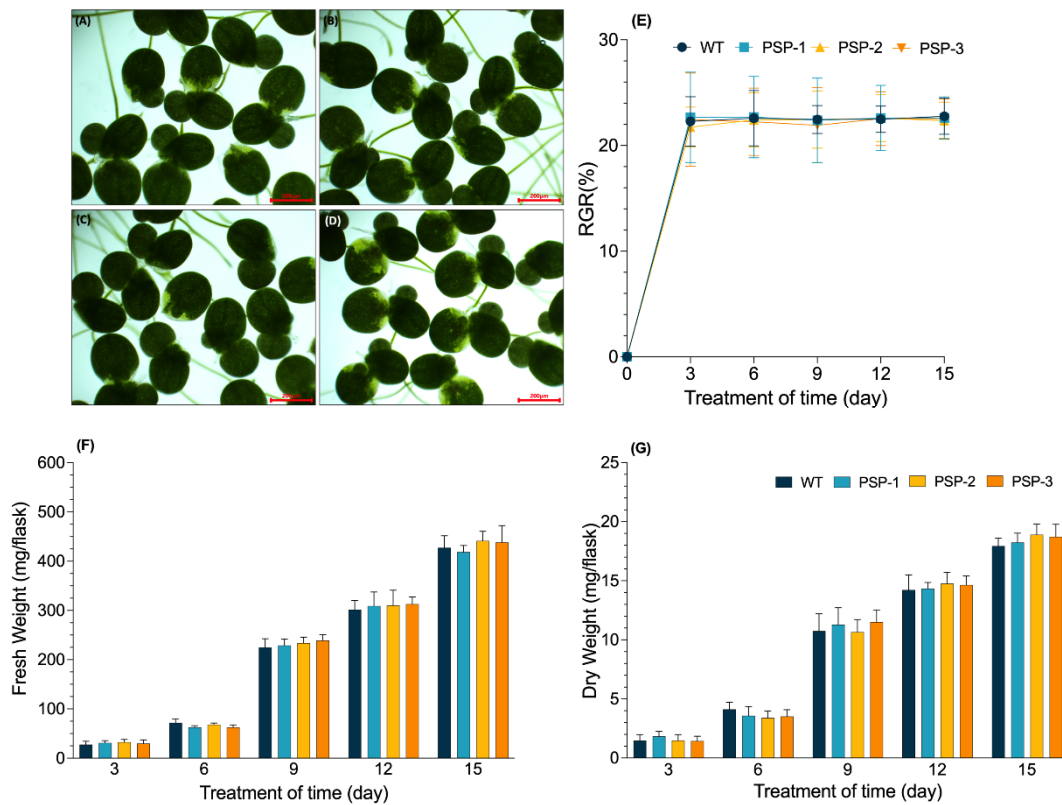

**Figure S2.** Analysis of phenotype, relative growth rate (RGR), fresh weight and dry weight in WT and three *AtPSP1* transgenic lines under Datko condition. **(A)** WT, **(B)** PSP-1, **(C)** PSP-2, **(D)** PSP-3 indicate the phenotype of WT and *AtPSP1* transgenic lines were cultivated under Datko condition for 9 days with dissecting microscope; **(E)** The RGR; **(F)** The fresh weight; **(G)** The dry weight. Each statistic is the mean  $\pm$  standard error ( $n=9$ , from three independent experiments with three repeats of each).

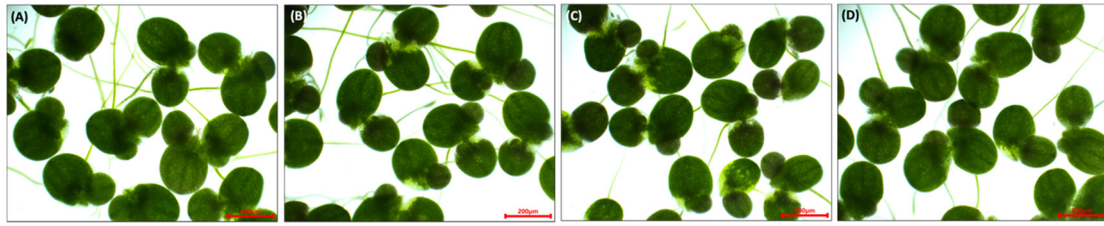

**Figure S3.** Phenotype of WT and three *AtPSP1* transgenic lines under sulfur-deficiency condition. **(A)** WT, **(B)** PSP-1, **(C)** PSP-2, **(D)** PSP-3 indicate the phenotype of WT and *AtPSP1* transgenic lines were cultivated under sulfur-deficiency condition for 9 days with dissecting microscope.

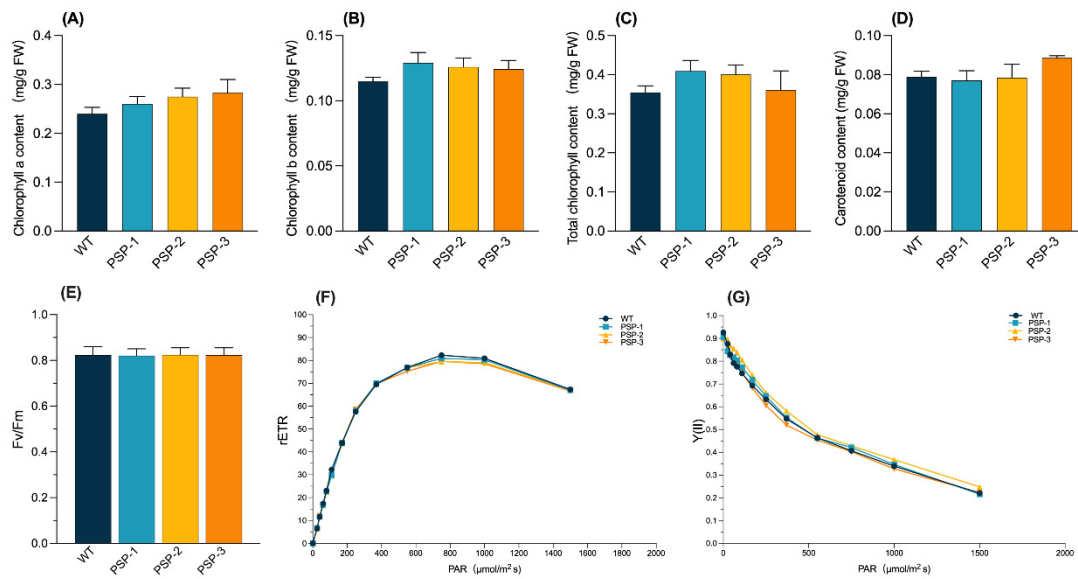

**Figure S4.** The analysis of photosynthetic pigment and chlorophyll fluorescence-related parameters in duckweed under full nutrition condition (Datko). **(A)** Content of Chlorophyll a; **(B)** Content of Chlorophyll b; **(C)** Total chlorophyll content; **(D)** Carotenoid content. The content of photosynthetic pigment was measured after the samples were cultivated under full nutrition condition for 9 days; **(E)** The value of Fv/Fm; **(F)** The value of rETR; **(G)** The value of Y(II), the chlorophyll fluorescence-related parameters were measured after the samples were cultivated under full nutrition condition for 6 days. Each statistic is the mean  $\pm$  standard error (n=9, from three independent experiments with three repeats of each, the data no average value in Figure F and G).

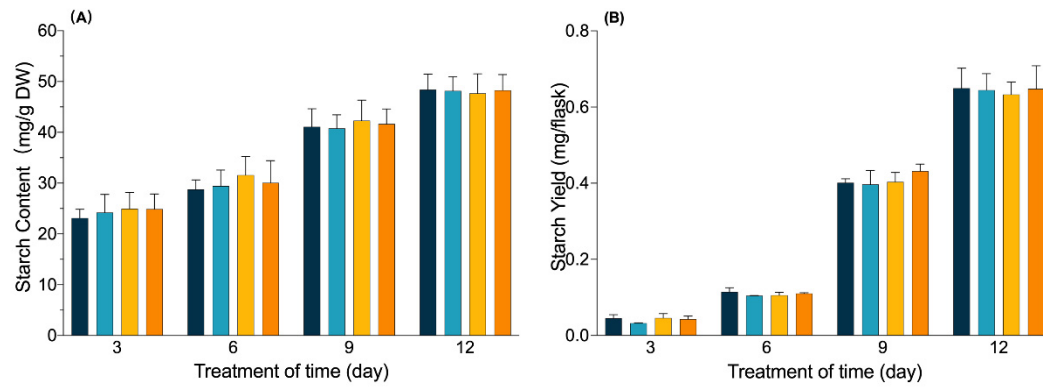

**Figure S5.** The content of starch , yield and the soluble protein in WT and three *AtPSP1* transgenic lines under full nutrition condition in different treatment of time. **(A)** The starch content; **(B)** The starch yield. Each statistic is the mean  $\pm$  standard error (n=9, from three independent experiments with three repeats of each).

**Table S1** The primer sequences in the study.

| Primer name                                                                                                                                                                                                                                                                                                                                                                                                                                                                                        | Primer sequence (5'-3')                                                                                                                                                                                                                                                                                                                                                                                                                                        | Note                                            |                                  |
|----------------------------------------------------------------------------------------------------------------------------------------------------------------------------------------------------------------------------------------------------------------------------------------------------------------------------------------------------------------------------------------------------------------------------------------------------------------------------------------------------|----------------------------------------------------------------------------------------------------------------------------------------------------------------------------------------------------------------------------------------------------------------------------------------------------------------------------------------------------------------------------------------------------------------------------------------------------------------|-------------------------------------------------|----------------------------------|
| <i>AtPSP1-F</i><br><i>AtPSP1-R</i>                                                                                                                                                                                                                                                                                                                                                                                                                                                                 | CCATGGGGATGGAAGCATTAAGTACTTCA<br>GGGTTACCCTTAGTCCAATGAGTTTATGAG                                                                                                                                                                                                                                                                                                                                                                                                | The primers for genes amplification             |                                  |
| <i>AtPSP1-RT-F</i><br><i>AtPSP1-RT-R</i><br><i>Lt18S-RT-F</i><br><i>Lt18S-RT-R</i>                                                                                                                                                                                                                                                                                                                                                                                                                 | GAAAGGCTGTTGCTGAAT<br>TCGTTCTCATCAAATCCC<br>ATACCGTCCTAGTCTCAACCA<br>ACAAATCGCTCCACCAAC                                                                                                                                                                                                                                                                                                                                                                        | The primers of genes for RT-PCR                 |                                  |
| <i>AtPSP1-qRT-F</i><br><i>AtPSP1-qRT-R</i>                                                                                                                                                                                                                                                                                                                                                                                                                                                         | GGTTGTGCCAGTTCAGGT<br>ACGAAGCAATTTGGGATG                                                                                                                                                                                                                                                                                                                                                                                                                       | The primer of <i>AtPSP1</i>                     | The primers of genes for qRT-PCR |
| <i>Lt18S-qRT-F</i><br><i>Lt18S-qRT-R</i>                                                                                                                                                                                                                                                                                                                                                                                                                                                           | ATAAACGATGCCGACCAG<br>TCAGCCTTGCGACCATAC                                                                                                                                                                                                                                                                                                                                                                                                                       | The primer of <i>Lt18S</i>                      |                                  |
| <i>LtAPK1-qRT-F</i><br><i>LtAPK1-qRT-R</i><br><i>LtAPR1-qRT-F</i><br><i>LtAPR1-qRT-R</i><br><i>LtPAPSS1-qRT-F</i><br><i>LtPAPSS1-qRT-R</i><br><i>LtSERAT1-qRT-F</i><br><i>LtSERAT1-qRT-R</i><br><i>LtSIR1-qRT-F</i><br><i>LtSIR1-qRT-R</i><br><i>LtSULTR1-qRT-F</i><br><i>LtSULTR1-qRT-R</i><br><i>LtSULTR2-qRT-F</i><br><i>LtSULTR2-qRT-R</i><br><i>LtSULTR3-qRT-F</i><br><i>LtSULTR3-qRT-R</i><br><i>LtSULTR4-qRT-F</i><br><i>LtSULTR4-qRT-R</i><br><i>LtSUOX1-qRT-F</i><br><i>LtSUOX1-qRT-R</i> | GAAGGAGCCAGTGGTGAA<br>AGTCGATACAGGGCGAAG<br>TCGCCATAGCTTTCAGTG<br>TTTCAGGGTTCAATCTTCC<br>ATGTCTGTTCCCATCGTTC<br>TCTTCTTTGTGGTGCTTGT<br>GCGGCTAATCAAGTGCTG<br>TTTCGGCGTAACTCCTCA<br>GTGAGCGTCCAGGATTTA<br>CCGATGCGATTAGTGAAG<br>TTTCTTCGGAGTCATCTT<br>CATTACACCAGGAATCTTT<br>AGCTCTGGCTGCAAGACT<br>ATGGCTGTAGGAGTGAAGTA<br>TCGCCAACGCCTGCTACT<br>CGCCCAAGTCCAAGACCACA<br>TGGGTCTGGTGGACTATGA<br>ACAAATGCAAGGGAGGAG<br>GGCGTATGAAATGAATGG<br>GTCAACTATGGGTGGGAAC | The primer of sulfur assimilation related genes |                                  |
| <i>LtAPS1-qRT-F</i><br><i>LtAPS1-qRT-R</i><br><i>LtSSS1-qRT-F</i><br><i>LtSSS1-qRT-R</i><br><i>LtGBSS1-qRT-F</i><br><i>LtGBSS1-qRT-R</i><br><i>LtAPL1-qRT-F</i><br><i>LtAPL1-qRT-R</i>                                                                                                                                                                                                                                                                                                             | ATAGAGCATAGCGTCGTTG<br>TTCATCCTCCGTCTCATAG<br>TGTGGCTCTTTGCCTGTA<br>TTCAACTTCGTGCTCTGC<br>CGGGTAACAGGAAGGGTG<br>TCCGGTTCTTTGGTGATTGA<br>CACCGTATCCCAAGTCCC<br>TCACCGTCTCGAAATCGT                                                                                                                                                                                                                                                                               | The primer of starch metabolism related genes   |                                  |

|                        |                        |                                                           |                                                     |
|------------------------|------------------------|-----------------------------------------------------------|-----------------------------------------------------|
| <i>LtISA1-qRT-F</i>    | GCACGCCTCTGAGCAACCCCT  | The primer<br>of starch<br>metabolism<br>related<br>genes | The<br>primers<br>of<br>genes<br>for<br>qRT-<br>PCR |
| <i>LtISA1-qRT-R</i>    | TGCCCATTCCATTCTGACCACA |                                                           |                                                     |
| <i>Ltα-Amy1-qRT-F</i>  | ATAATCCGCTCAGAGTTCG    |                                                           |                                                     |
| <i>Ltα-Amy1-qRT-R</i>  | ACCGATACCTTACCCTCC     |                                                           |                                                     |
| <i>Ltβ-Amy1-qRT-F</i>  | GGCATTTCATTGGTGGTAC    |                                                           |                                                     |
| <i>Ltβ-Amy1-qRT-R</i>  | GTCGTGCTTCTTGAGGGT     |                                                           |                                                     |
| <i>LtPFK1-qRT-F</i>    | TCGGAATAATCGCTGTCTC    | The primer<br>of carbon<br>metabolism<br>related<br>genes |                                                     |
| <i>LtPFK1-qRT-R</i>    | CGTGAACCTTGTCCTTACC    |                                                           |                                                     |
| <i>LtFBA1-qRT-F</i>    | AACCTCAATGCCATGAACC    |                                                           |                                                     |
| <i>LtFBA1-qRT-R</i>    | TCCACCTTACCTGCCCAC     |                                                           |                                                     |
| <i>LtPK1-qRT-F</i>     | TCAGGCAGAGCAGCAAAG     |                                                           |                                                     |
| <i>LtPK1-qRT-R</i>     | CTGGGTTCCTCGAGAAAGT    |                                                           |                                                     |
| <i>LtPDC1-qRT-F</i>    | GCCCAATCTTCAACGACTA    |                                                           |                                                     |
| <i>LtPDC1-qRT-R</i>    | CTTCATCAGAACGCACCC     |                                                           |                                                     |
| <i>LtACO1-qRT-F</i>    | GGAGTGACCGCAACAGAT     |                                                           |                                                     |
| <i>LtACO1-qRT-R</i>    | GCACCGTATTGAGGAGACA    |                                                           |                                                     |
| <i>LtIDH1-qRT-F</i>    | AACGACATACGGCTTCTA     |                                                           |                                                     |
| <i>LtIDH1-qRT-R</i>    | TTACCCATTACCTGACAAC    |                                                           |                                                     |
| <i>Lt2OG-DH1-qRT-F</i> | ATTCACGGAGATGGGAGTT    |                                                           |                                                     |
| <i>Lt2OG-DH1-qRT-R</i> | CAGCGGTCCGATCAGTAG     |                                                           |                                                     |
| <i>LtSDH1-qRT-F</i>    | AATGTAACCAAGGAGCCG     |                                                           |                                                     |
| <i>LtSDH1-qRT-R</i>    | TTTGCGCCATGAACTGAT     |                                                           |                                                     |
| <i>LtFUM1-qRT-F</i>    | AACGACATACGGCTTCTA     |                                                           |                                                     |
| <i>LtFUM1-qRT-R</i>    | ATTACCCATTACCTGACAAC   |                                                           |                                                     |
| <i>LtMDH1-qRT-F</i>    | GCTTCATCTGGGTCTGGT     |                                                           |                                                     |
| <i>LtMDH1-qRT-R</i>    | CGTTCGTCATCGTCGTTA     |                                                           |                                                     |
| <i>LtCS1-qRT-F</i>     | TTGGACTATGGCGGAAAT     |                                                           |                                                     |
| <i>LtCS1-qRT-R</i>     | GCAGTATGGGCGCTAACA     |                                                           |                                                     |

## The sequence of genes

### *AtPSP1*

ATGGAAGCATTAACTACTTCAAGGGTTGTGCCAGTTCAGGTCCCCTGTAGAAAGC  
TCTCTTCACTTTTTGCTAATTTTTCTTGCCTTGAGTTAAGGAGATATCCTTGAGAGG  
TCTTGTCTCCATTATGAACCATCCCAAATTGCTTCGTCCAGTGACTGCTTCTGTGCA  
GCCTCACGAGTTGTCGACTTTGGGGCATGAAGGCAACATTGTTCCCTTCTAAAGAA  
ATTCTTGATCTTTGGAGAAGTGTTGAAGCGGTATGTTTCGATGTGGACAGCACGGT  
TTGTGTGGATGAAGGTATTGATGAACTTGCTGAGTTTTGTGGAGCTGGAAAGGCT  
GTTGCTGAATGGACTGCCAGAGCTATGGGTGGATCTGTTCCATTTGAAGAAGCTCT  
AGCTGCAAGACTTTCTTTATTCAAGCCTTCTCTTTCAAAAGTAGAGGAATATCTCG  
ACAAGAGACCCCCAAGGCTATCTCCTGGCATTGAAGAGTTGGTCAAGAAACTCA  
GAGCCAATAACATTGATGTCTATTTGATATCTGGAGGTTTTTCGACAGATGATCAAT

CCTGTAGCATCGATTCTTGGCATCCCTCGGGAGAATATCTTTGCCAACAATCTTCTA  
TTTGGAAGACTCCGGCGAGTTTCTGGGATTTGATGAGAACGAACCTACGTCAAGAA  
GTGGAGGCCAAAGCCAAGGCAGTGCAACAAATACGAAAGGGTCGTCTCTACAAG  
ACTATGGCCATGATTGGAGATGGTGCTACTGATCTCGAAGCACGTAAACCTGGTG  
GCGCAGATTTGTTTCATATGCTACGCTGGAGTTCAGCTTCGTGAAGCCGTTGCAGCA  
AATGCAGACTGGCTTATCTTTAAGTTTGAATCTCTCATAAACTCATTGGACTAA

### *Lt18S*

CTCAAAGATTAAGCCATGCATGTGTAAGTATGAACTAATTCAGACTGTGAAACT  
GCCAATGGCTCATTAATCAGTTATAGTTTGTGGATGGTACCTGCTACTCGGATA  
ACCGTAGTAATTCTAGAGCTAATACGTGCACCGAACCCCGACTCCCGGAAGGGG  
CGCATTTATTAGATAAAAGGTCGACGCGGGCTCGTCCCGCAGATTCGATGATTCA  
TGATAACTCGACGGATCGCACGGCCTTCGCGCCGGCGACGCATCATTCAAATTTT  
TGCCCTATCAACTTTTCGATGGTAGGATAGGGGCTACCATGGTGGTGACGGGTGA  
CGGAGAATTAGGGTTCGATTCCGGAGAGGGAGCCTGAGAAACGGCTACCACATC  
CAAGGAAGGCAGCAGGCGCGCAAATTACCCAATCCTGACACGGGGAGGTAGTG  
ACAATAAATAACAATACCGGGCTCTTCGAGTCTGGTAATTGGAATGAGTACAAT  
CTAAATCCCTTAACGAGGATCCATTGGAGGGCAAGTCTGGTGCCAGCAGCCGCG  
GTAATTCCAGCTCCAATAGCGTATATTTAAGTTGTTGCAGTTAAAAAGCTCGTAG  
TCGGACCTCGGGTCGGGTTCGGGCGGTCCGCCTCTGGGTGTGCACCGGCCGTCCTCG  
TCCCTCCTGCCGGCGATGCGTTCCCGCCCTTGATTGGGCGGGTCGTGCCACCGGC  
GCCGTTACTTTGAAGAAATTAGAGTGCTCAAAGCAAGCCCACGCTCTGCATACGT  
TAGCATGGGATAACACCACAGGATTCCGGTCCTATTGTGTTGGCCTTCGGGGTCG  
GAGTAATGATTAAGAGGGACAGTCGGGGGCATTCGTATTCCGTAGTCAGAGGTG  
AAATTCTTGGATTTACGGAAGACGAACGACTGCGAAAGCATTTGCCAAGGATGT  
TTTCATTGATCAAGAACGAAAGTTGGGGGCTCGAAGACGATCAGATACCGTCCT  
AGTCTCAACCATAAACGATGCCGACCAGGGATCGGCGGATGTTGCTCTAAGGAC  
TCCGCCGGCACCTCATGAGAAATCAGAGTCTTTGGGTTCGGGGGGGAGTATGGTC  
GCAAGGCTGAACTTAAAGGAATTGACGGAAGGGCACCACCAGGAGTGGAGCC  
TGCGGCTTAATTTGACTCAACACGGGGAACTTACCAGGTCCGGACATAGCAAG  
GATTGACAGACTGAGAGCTCTTTCTTGATTCTATGGGTGGTGGTGATGGCCGTTT  
TTAGTTGGTGGAGCGATTTGTCTGGTTAATTCCGTTAACGAACGAGACCTCGGCC  
TGCTAACTAGCCACGCGGAGGCGACCCCTCCGCGGCCGGCTTCTTAGAGGGACTA  
CGGCCGTTTCAGGCCGCGGAAGTTTGGAGCAATAACAGGTCTGTGATGCCCTTAG  
ATGTTCTGGGCGCGCACGCGCGCTACACTGATGTATTCAACGAGTTTATAACCTCG  
GCCGGAGGGCCCCGGGTAATCTTTGAAATTTTCATCGTGATGGGGATAGATCGTTGC  
AATTATCGATCTTCAACGAGGAATTCCTAGTAAGCGCGAGTCATCAGCTCGCGTT  
GACTACGTCCCTGCCCTTTGTACACACCGCCCGTCGCTCCTACCGATTGAATGGT  
CCGGTGAAGCGCTCGGATCGCGGCGACGAGGGCGGTCCCCCGCCGCGACGTCG  
CGAGAAGTCCGTTGAACCTTATCATTTAGAGGAAGGAGAAGTCGTAACAAGGTT  
TCCGTAGGTGAA

### *LtAPK1*

ATGTCGGATGCTCTGGGATCGGCTCTCGGAGGACGCTTATGGTGCTCTGCGCCCCG

AAGAAAGATCTGGATTCTTCGGCCGTGGCGATCTGAGGAACTTCTCCGGGATCAG  
GATTTTGAATAGGAGAGTGAAGGAGCCAGTGGTGAAATCGGAAGCATTCCGGCA  
GATCATGGCCGGAGAGAGATCCAGAAACCGGAAGGATGTTGATGCTGCATTGGC  
TCCCGTAGTTGAGACGAAACTTCGCCCTGTATCGACTGTCGGGAGATCAACGAAC  
ATTGCCTGGCATGAATGTCCCGTTGGAAGATTTCGATCGAGAGAAATTGCTAGGGC  
AGAAAGGATGCGTCATTTGGATCACAGGTCTCAGTGGCTCAGGGAAAAGTACGC  
TGGCATGCGCTTTGAGCGGGGAGCTTTATTCCAGAGGATGTTTATCTTATGTTCTTG  
ATGGAGATAACGTCAGACATGGACTGAACAAAGATCTTAGCTTCAAACCAGAAG  
ATCGCGCGGAAAATATTCGAAGAATCGGAGAAGTGGCAAAGCTCTTTGCAGATG  
CCGGTATCATCTGCATTGCTAGCTTAATTTCCCCTTATAGAAAGGATCGAGATGCTT  
GCCGCGCTCTTCTTCCCGATCCTACATTCATTGAGGTTTTCTTGGACATACCGCTGG  
AAGTATGTGAAGCTAGGGATGTCAAAGGCCTGTACAAGCTTGCACGAGCAGGCA  
AGATTAAAGGATTTACTGGGATAGATGACCCATATGAGCGGCCCTTCAATTGTGAG  
ATTTTAATACAGCAGAAGGATGGGGTTTGCCCTCCCCGGGAGACATGGCAGAAC  
AAGTCGTTCTCTACCTGGAAGCGAATGGCTTTCTAGATGTATAG

### *LtAPR1*

ATGGCGACGATGGCTGCTTCTCTCTTCAACCCGTTCTTCTCTCTACGCCAGCT  
GAAGGCATCCAGGACTATATCAGGTATGCCTGCAGAATTTCCCGCGGCGATCATC  
GGCCAAAGGGAGCCACTCGTTCGACTGCAAGTACAATGCATGAAGCCAATGAGA  
GGGAGATCCCCTAGAGCTTCTCTCTCTCATCAGTCACCGGAGAGACCGCTGAAT  
CTCAAGGAAAGGCGGCGGCCAAATTGAAGGAAGCCAATTTGAGAAACTGGCG  
GAAGACCTGGACGCGGCCTCTCCCCTGGCGATCATCGACAAGGCTCTGGACTTGT  
TTGGCAACGATATCGCCATAGCTTTCAGTGGCGCGGAGGATGTGGCTCTAATTGAG  
TATGCCCCGGTTAACAGGGAGGCCTTTCCGAGTATTCAGCCTTGACACAGGAAGAT  
TGAACCCTGAAACATAACCACTTCTTTGACGCTGTGGAGAAGCACTACAACATTCA  
CATAGAGTATGTTTTCCCGGAGGCAGTAGAAGTTCAAGGACTGGTTAGAAACAAA  
GGCCTTTTCTCTTTCTACGAAGATGGTCAACCAAGAATGCTGCAGAATAAGGAAGG  
TGAGGCCTCTGAGGAAGGCTCTTAAGGGTCTTCGCGCTTGGATTACAGGCCAAAG  
GAAGGATCAGTCTCCGGGCACCAGAGCCAGCATACCCGTCGTTAGGTTGATCCA  
TCTTTTGAAGGATTGGACGGTGGAGCAGGAAGTTTGATAAAATGGAACCCGGTGG  
CCAACGTTGAAAGCGCACATATTTGGAGTCTTTTAAGAATAATGAATGTTCTATC  
AACTCCCTACATTCCAAGGGATACGTGTCGATTGGTTGTGAGCCTTGTACAAGGG  
CAGTACTTCCCGGGCAGCATGAGAGAGAAGGGAGATGGTGGTGGGAAGATGCCA  
ATTCAAAGGAGTGTGGTCTCCATGAGGGTAACGTCAAACAAGACTTGGAGAAGC  
CGAAGACCGGCAACGGGGCCTCTAATGGTCCCTTGGATCTCTTCCAAACATCCTC  
AATTGTGAGCCTCAGCAGGCTTGGGATAGAGAACTTGCTCAGAGTTAAGGGAAG  
GAGAGAGCCATGGATTGTTGTGTTGTATGCGCCTTGGTGCGGCTTTTGCCAGGAA  
ATGGAGGGTTCTTACTTGGAGCTTGCGCAGAGGCTCTCTCCTTCAGGCATCAAGG  
TAGCAAAATTCGAGCTGATGGTGACCAAAAGAAATTTGCGGATGAGAAATTGC  
AGCTGGATAGCTTCCCAACTATCCTTTTCTTCCCCAAACACACTTTAAAGCCTGTC  
AAGTATCCTTCCAAGAACAGAGACTTGGACTCTCTTCTAGCATTTGTGAATACCCT  
TTACTAA

### *LtPAPSS1*

ATGGTGTCCATGGCAGCGGGTCTCTCCTGGGCTCGCAACCCAGCTGCCCCTTTTCT  
CAGAACCCACCACCATCTCTTCCCCAAGATCGGATTTTCCCAGAAGTTCGAGTCC  
AAGATCGCTCGCGGCTCACTCCAAGTGCATGCAGTCTCATAGACCCCGACGGCG  
GATCGCTAGTGAACCTGATCGCTCCAGAAGGCCTTAGAGAGACTAAGAGCCGAG  
AAGCGCTCTTACCCAGCATGCCCAGAATCAAGCTATCGAATATCGATCTCCAGTG  
GGTTCACGTCTCAGCGAGGGGCTGGGCTAGCCCTCTCCGCGGCTTCATGAGAGAA  
GCCGAGTTCCTCCAAACACTTCATTTCAACTTCCTCCGTCTTCAAGACGGTACGGT  
GGTGAACATGTCTGTTCCCATCGTTCTCGCCATCGACGATTTCGAGAAGCAGGAG  
ATCGGCAATGGCAGAAATGTCACTCTGGTCGACGAAAACGATAATCCCGTGCGC  
ATCTTGAGCAACATCGAGATATACAAGCACCACAAAGAAGAGAGGATAGCAAGA  
ACATGGGGAACAATAGCCAAGGGTCTCCCTTACGTCTGAAGAAGCTATCACGACG  
GCTGGAAACTGGCTCATCGGAGGCGACTTAGAGGTCTTAGAGCGAATCAAATAC  
AATGACGGTCTTGATCAGTACCGATTATCGCCTTCAGAACTCCGCGATGAGTTCAC  
GAAAAGGAATGCGGATGCCGTCTTTGCTTCCAGCTTCGGAATCCTGTCCACAAC  
GGGCACGCCTTGCTCATGACTCACACTCGTGAGCGACTTCTTGAGATGGGATACA  
AGAACCCAATTTTGCTACTGCATCCGCTGGGTGGATACACTAAAGCAGACGACGT  
ACCGCTATGGTGGAGAATGAAACAACACGAGAAGGTGCTGGAGGAAGGGGTTTT  
GAATCCAGAGACAACGGTGTTGGCAATATTTCCGTCTCCGATGCTGTATGCAGGG  
CCGACTGAGGTTCAATGGCATGCGAAATCGAGGGCTGAATGCTGGTGCGAATTTCT  
ATATTGTGGGACGGGATCCGGCGGGGATGAGTCATCCGACGGAGAAGAGAGATC  
TGTATGATCCTGAGCATGGTAAGAAGGTGCTGGGGATGGCTCCCGGATTGGAGAA  
GCTGAATATCATTCCGTTTAGGGTAGCAGCATATGACAAAAACAAATGAAGATG  
TCCTTCTTTGACCCATCAAGGCCCGACGATTTTCATCTTCATATCAGGCACCAAGAT  
GAGGACCCTCGCAAAAAACATGGAGAGCCCTCCAGACGGGTTTCATGTGCCCCGG  
CGGCTGGAACGTGCTTGTCGAATACTATCAAGGCTTGCTTTCTTCAGAAGACAGC  
GGTCTTCGTCAATCTGTCCCTGCTTAA

### *LtSERAT1*

ATGCAGTTTCCTAGAGAAATCCATAGGAAACCGCGTGTTCTTGAGCCGTATTTCTT  
TTCCAAGTCTAGAGAGATGGAGAACGAGATGTTCCGGCATCTCAATCCCACTACTA  
AGCCAGACCGCCTTGGAATGGAGGCTTCATCGCCCGGCGTTGAACAAAGCTTG  
ACCGTGCCGACAGAGGCGTTGACTACTCACAGTCAACCGTATTATCTGACGGGCA  
GCTACCCGTTCTTCTCCACTCTACAGGAGGCAGCCATCAACAGTCTTCATTCTCGG  
GATCTATTTCTTTCTGCGCCTGCTCCCTCGATCCCCGGTTCTTTCTCGGCGTCAAAT  
ACTTGACATTTGGAGCTGAAGACGATGCAGAGATTTTAGCGCCAGGAAGATGGA  
GCTTGAGGAACAAATTGGCCAGCAGATGCTTCAAGCCCGATTTTCAAGCGGGTC  
TTACGGCGTTCCGGGCAACGAGCTTTCCTCACGCTCGGATCTCGCCAGCAATCA  
GGCATGGAAATGGCTGGAGTTGCGGATCAATGCTCGGAAATGAGCTGCTCCGAG  
ATAACTCAAATCTGTTCCCACGAATCAAGAAACCCTGTTCAAATCTCCCAGACGG  
TGTTGGCCTCTACTTATCTTCATGCGGCTAATCAAGTGCTGGCGGAAATCACCTCC  
CATGCGCTAGAAGATCCGTATAAGCCTCAAGATCCTGATTATGCTTCCGGAAGAG  
GGTGTTCGTGCTTGAGTTCTGAGGAGTTACGCCGAAATTCTCCGTATGAACCGAA  
GACGTTGAAAACCGAGCTGATCAGTCTGCTGCAGATGATCGACCACGGATACGA



CGAGTGCCTCGACCGAGTGCAGAGCGCCATAGCGACTTTCAAGAACGCGACGAA  
CCTAGCTCCCGCCCAAACGCCAGCCCGCTTCGCTCTCCACACGGTCTCCGCTCTC  
TACAAAAGCCTGAGGGACAGAATCAGCTGGCAAATGCAGAAATTCAACCGGGA  
GCGTGCGTTGGATACGGAGTCGTCTTTAGAGTGCTCGTTCCTCCAGAGGCAGTGG  
GAGTTGCAGCAGCTGAAGAGCGAGCACCAGTCGTGGAGGCCTCAAAGGGGGTT  
ACCGGAGAAATCAGTCGCCGTTCTTCGGAGCTGGATGTTCCAGAACTTCCTGCAC  
CCGTACCCCAAAGACAACGAGAAGCAGCTGCTGGCGATCAAGAGCGGGCTGAC  
CAGAAGCCAGGTACTTTTTTCAGTTTTCTCTACCAAAAAAAGACTGACCGCC  
ATTAATGTTTTCTGCGAGCTTCAGGTCTCAAAGTTCATCAACGCTCGCGTGCG  
CCTGTGGAAACCCATGATCGAAGAAATGTATCAAGAGATGGGTAGAAGCTCACG  
AGGGGAGGAAGATCCAAGGAACCCAGAATAA

### *LtSIR1*

ATGAAGAAAAAACGTTGAGGGAGATTATCGAAAAGTATAATCTAAGTGTGATGA  
TACTCCGAACCAGAATCTGATTCTCTGTGACATTCACCGGTCTTGAGACAGCC  
AATCACCCTGCTCGAGCACAGGGAGGATTACTGCTTCCACAGTACGTTGACCCT  
CTCAGCATCACTGCAATGGCGTGCCCGGCTCTTCCGCTGTGCCCTCTGGCAATCAC  
AGAGGCTGAGAGAGGAATACCAGACATTTTAAACGAGTTAGAACTGTTTTTGAC  
AAGGTGGGCCTCGAGTTCAAGGAATCGGTCGTCATAAGGGTCACCGGATGCCCTA  
ATGGATGTGCCAGGCCGTACATGGCCGAATTAGGGCTTGTTGGTGATGGACCTAAT  
AGCTTCCAGATTTGGCTGGGGGGGACGCCGAATCAGACAGAATTAGCAAGGGCC  
TTCTTGAATAAGGTGAGCGTCCAGGATTTAGAGAAGGTGCTTGAACCATTATTCTA  
CCACTGGAAGGGGAGACGTTTACAGGGAGAATCCTTCGGCAACTTCTACTAATCGC  
ATCGGTTTTCGAAGAGCTTCAGAATATAGTGGAGAATTGGGAGGGTCCAACGGATA  
GTCCTTCGGAATCAATCTGA

### *LtSULTR1*

ATGGCTGGATGCAAGACGGCGGTATCCAACATCATCATGTCTCTTGTCGTGTTGTT  
GACTCTTGAAGTCATCACGCCTCTCTTCAAGTACACGCCAAACGCGGTCCTCTCA  
TCGATCATAATATCAGCAGTTATTGGTCTCGTTGACTTTGAGGCCGTTTTCTTATTT  
GGAAGGTCGATAAGTTTGACTTTATAGCTTGCATGGGAGCTTTCTTCGGAGTCATC  
TTCGCTTCCGTGGAAATTGGTCTTCTAATCTCCGTGGCTCTATCGTTTGGGAAGATT  
TACTCCAGGTGACGAGACCGAGGACCGCTCTTCTAGGAAATCTTCCAGGAACCA  
CTATTTATAGAAACGTTGACCAGTACCCCGAGGCGACAAAGATTCTTGGTGTAAT  
GATCATTAGGGTTGACTCTGCCATTTATTTTTCCAACCTCGAATTACATAAAGGATAG  
GATTTTGAGATGGTTGACTGATGAGCAAGAGAAGGCTGACCAGAGTCAACTTCC  
AAAGATAGAATCTGTGATAGTGGAGATGTCCCGTGAGTATCATCTGACTCCCAA  
AACTTATTGGTTCAGGAAATTTGA

### *LtSULTR2*

ATGATTTCTACTCTGGTGGTCAAGCTTTCTAGGGCTGACCTTCATGGGATCAAAAT  
TATCAAAAATGTAGAAGCTGGTCTCAATCCAAGCTCAGTCAAACAGCTGCAATTT  
GTGGGCTCACTTGTTGGAGAGGCTGTTAAAATAGGTCTTATTTACGCGATCATCGC  
CCTCACGGAAGCAATTGCGGTGGGCCGCTCATTTGCTTCGGTAAATGGTTACCAG

CTTGATGGGAACAAGGAGATGTTGGCCATGGGTTGCATGAATATTGCTGGATCAAT  
GTCATCTTGCTATGTAGTAACAGGTTCTTCTCAAGAACAGCCGTAAACTTCAGCT  
CTGGCTGCAAGACTGCAGTATCAAACATCGTCATGGCTCTAACAGTGATCCTATCT  
TTGGAGCTGCTCATGAAGTTGCTCTACTTCACTCCTACAGCCATCTTGGCATCCAT  
CATCCTTGCCTCTCTACCTTCATTGGTTGATGTTGCGAGAAGCCTTCCGGATTTGGAA  
AATTGACAAAGTTGACTTTCTAGCTTGTGTGCGGAGCTTTCTTTGGCGTGCTCTTCA  
AATCTGTGGAGATAGGTCTTCTAATTGCGGTATTTATCTCCTTGCTAAAGATCTTAA  
TCGGGTCTCTTTGGGCTCGAATTGATGCACTCGGAAAGATAGAAGGAACAAGCAT  
CTTCTGCAACATCAAGCAATTCCCCATGGCAATTAGAACTCCTAAGATGCTGATTC  
TTCGAGTCAACTCCCCTTTCAATTTGTTTTGCCAACTCTAGTTCAATTCGTCAGAAGA  
TCTTGAGTTGGGTGAAGGAAGATAGAGAAATGACAGAGGAGAACCCAGAAGAT  
AGAGCTAGAGGGGTAGTCCTTGATATGTCAAATGTGATGAATATTGACACCACCG  
GCCTAATTGCCCTTGAAGAACTTCACAAGCAGCTCCATTCAGATGGCTTACAGAT  
GGCAGTAGCCAATCCAGGTTGGCGTTTGATCCACAAGATGAGGATGGCGAAGCTC  
TCCAGCAAGATAGGAGAAGACATGTTATTCCTCAACGTAGCTGACGCGGTCTGAAG  
CTTGCTCGGACTTTGCAAGAACACTGCTCCACGTCAATAA

### *LtSULTR3*

ATGAGTAGGCTTCTCTCTCTCTCTCTCTCTCTCTCTCTCTCTCATTCCCCTTTC  
CCTCCAACGGTACCGTGATACAGAGAAGTCTCCAGTCATCTCTCTCTAGATCTCTT  
TCTCCTTGTAATCGATGGGGAACGGAGATGGACTAGGGTTTCAAGGAGCAGCA  
AGGGATGGAGTAGAGTGTTCCACAGAGTTCCTGTTCCGCAGTCAAGGCCAGTTT  
TGGAGACCTGAAGGTCAATCTCAAGGAAACCTTCTTCCCTGACGACCCTCTGCG  
TCATTTCAAGGGGCAAACGACGTCCCGCAGGGTGCTGATGGCTCTGCAATACTTC  
CTTCCCATTCTCGAATGGGGTCCACGCTACAACCTTGGCCTTCTTCAAAGCTGACAT  
CGTCTCTGGTATTACCATCGCTAGCTTAGCCATCCCTCAGGGGATTAGCTATGCCA  
AGCTCGCAAACCTCCCCCAATCCTTGGTCTCTACTCCAGCTTCGTACCGCCTCTG  
GTGTACGCCTTAATGGGGAGCTCGAGGGACCTGGCGGTGGGCACCGTGGCCGTG  
GCGTCTCTCCTCATCGGATCCATGCTCGGAAAGGAGGTTTACCAGTTTCAAAATCC  
CACTCTCTACCTTCATCTGGCCTTTACTGCAACCTTCTTCGCTGGCGTCTTCCAGGC  
AGCTCTGGGTTTCTCAGGCTGGGATTTATCGTAGACTTTCTCTCTCATGCGACCAT  
CGTGGGCTTCATGGGCGGCGCAGCCACGGTTGTTTGCCTTCAGCAGCTGAAGGGT  
ATCCTCGGACTCCATCACTTCACCACCGCCACAGACCTCATCTCCGTCATGGAGTC  
TATCTTCTCCAGACCAGGCAGTGGAGATGGGAAAGCGCGGTGCTTGGAGTCGTC  
TTCTTGTTCTTCCTTCTCCTCACCCGTTTCTGAGCAAGAAGAACCCAAAGTTCTT  
CTGGATATCAGCAGCAGCTCCATTGGCCTCCGTCTGTTCTCGGAAGCGTTTGGTAT  
TCTTTACCCGGGCTGAGAACCATGGGGTCCAAGTGGTTGGGAAGCTAACTAAAGG  
GCTCAACCCCCCATCCTTCAGCGATCTTACCTTCACCTCGCCCTATGTAGTGATCG  
CTTTGAAGACTGGCGTCGTCACCGGCATCATTGCTCTTGCAGAAGGCATAGCAGT  
GGGAAGGAGCTTCTCCATGTTTAAAGGGGTATCATATTGATGGTAACAAGGAGATG  
ATCGCCATCGGCATGATGAACATAGCCGGGTGAGTCACCTCGTGCTACCTCAAA  
CTGGGCCATTCTCGAGGTCTGCAGTGAACACAACGCCGGGTGCAAGACAGCCG  
TCTCTAACATAGTCATGGCGATGGCGGTGATGATAACTCTGTTGTTCTGACGCCA  
CTTTTCTATTACACGCCGTTGGTCGTCCTCTCCTCTATTATTATCGCTGCAATGCTAG

GACTTATTGATTACGAGGCCGCGTTTCACCTCTGGAACGTCGACAAGGTCGACTT  
CTCCGTCTGCATGGGCGCCTACTTTGGTGTCTCTTCTGCAGCATAGAGATCGGCC  
TCATTATCGCGGTGGGTATTTCAATGCTTAGGATTTTACTCTTTGTGTGCGAGGCCGA  
GGACTACTGTCCTGGGGAACATCCCCAACTCAATGATCTACAGAAGACTGGATCA  
GTA CTCCGATGCTCAAGTTGTTCTTGGATTGCTCATCCTTCGTATCGATGCTCCCAT  
ATACTTCGCCAACGCCTGCTACTTGGGAGAGAGGATCTTGAGATGGATTGATGAG  
GATGAAGAACGAAATAGGGTGAAGGACGAAGGGAGCCTACTGTATGTGGTCTTG  
GACTTGGGCGCTGTGGGGAGCATCGATAACAGTGGGAATAAGCATGCTGAAAGAG  
ATGAAGAAAACGATGGAGAATAGAGGGCTCAAGTTAGTGCTGGCCAACCCGGGG  
AGTGAAGTGATGAAGAAGCTCGATAACTCCAAGGTCATGGAAGCCATAGGCCAG  
GAATGGATATTCCTCTCTGTGAGTGAAGCTGTTGGGGCTTGCCATTTTCTACTCCAC  
TCCTGCAAGGCCGCGAGGCTGCAGGTGGGGCAGCCATTCCCAGCGACCACTAT  
GTTTGA

#### *LtSULTR4*

ATGGATATCTCTTACGCCTCGGCGAGCAACACGGACATCGCCGGGATGCTCTCCG  
GCGGTTCAAGGCTCCGGGAGGCAAGTGAAGGTCATCCCTCTGCAACATCCGAACG  
TCTCCAACCTCTCAGCCCCGCCGACGGCGACGCTTCTCATCAAGTGGCTGCCAAA  
CTTTACGGGGATGTCGTCTCGTGA CTGGACGGCGCTCATTTTGCCTTGTTGCGGAT  
GGATCCGGTCCTACAGGTGGAGAGAATACCTGCAGGTCGACCTTATGGCCGGCAT  
CACCGTCGGCGTCATGCTCGTTCCACAGGCTATGTCATATGCAAAGTTGGCCGGC  
CTTCATCCCATTATGGACTCTACTCTGGTTTCGTACCTATATTTATTTATGCGATTTT  
TGGGTCATCACGGCAACTTGCGATTGGTCCCGTGGCCTTGGTGTCTCTCTTGGTCT  
CTAATGTTCTTGGAACATCGTTGACTCATCGGATCCACTTTACACGGA ACTGGCA  
ATTTTGCTGGCTTTCATGGTAGGCGTTCTGGAATGCATTATGGGTTTGTTGAGGCTT  
GGATGGCTTATACGTTTATCAGCCACTCTGTTATTTCTGGCTTCACCACTTCCTCA  
GCCATTGTTATCGCATTATCTCAAGCCAAATATTTTTTGGGATACAGTATTGTTAGA  
AGCAGCAAAATTGTACCTCTTGTTAAGAGTATAATTGCAGGAGCTGGTAATTTTAT  
GTGGCAACCTTTTATGATGGGATGCATCATGCTTACAATTCTTCTTGATGAAGCA  
CCTGGGAAAAACTAGGAAAAAGCTGAAATATTTAAGAGCAGCTGGTCCACTTAC  
AGCAGTTATCTTGGGCACAGCTTTCGTGAAAATATTTGCCCCTTCTTCTATTTCACT  
GGTGGGGGATATACCCCAAGGTCTTCCAAAGTTTCTATTCCGAAAGAATTTGGGC  
ATGCAAAATCATTGATATCAACTGCGATGCTGATAACTGGGGTTGCCATATTGGAG  
TCTGTTGGCATTGCTAAAGCACTAGCTGTTAGAAATGGGTATGAACTGGATTCAA  
TCAAGAGTTATTTGGTCTTGGTGTGGCAAATATATGCGGGTCATTTTTTCTGCATA  
TCCAACCACAGGATCTTTTTCTAGATCCGCTGTAAACCACGAGAGTGGAGCGAAG  
ACTGGATTATCTGGATTGATGATGGGAATTGTAATGGCATGTGCTCTAATGTTTTTG  
ACGCCATTATTTACCGATATACCCAGTGTACATTGGCTGCCATTGTAATATCTGCT  
GTAATGGGTCTGGTGGACTATGATGAAGCGATCTTCTTGTTGGCGTGTGGACAAGA  
AAGACTTTCTTCTATGGACGATTACTAGCATTACAACATTGTTTCTGGGCATCGAG  
ATCGGTGTTCTAGTTGGGGTGGGCTCCTCCCTTGCAATTTGTCATCCACGAATCAGC  
AAACCCCCACATAGGTCTGTTTTCTCGCCATTTTCATCCGCATTCTTATTATCATCATC  
TATCAATCTCCCATCATGCACCATCACTACCAATTCATCATTCTTGTA

### *LtSUOX1*

ATGGCGGCACTGGTGGGTCTCATGAGTACTCCCAAGAGCCGCAACGCCATCCAT  
GTCTTCGGATCAATGCGAAGGAGCCTTTCAATGCCGAGCCGCCGCGCTGCTCT  
GGTGTCTGTCGTACATCACGCCGGTGGATCTGTTCTTCAAGAGGAACACGGACCT  
ATTCCTATCGTCACTGACCTCGACAGATATCGCGTGTCTTTGAGTGGTTTAATCGGC  
AAATCGATTCACTTTTCGATGGCAGATATCAGGAATCTTCCCAAGCACACTGTCAC  
TGCTACACTCCAATGCGCCGGTAACAGAAGAACTGCCATGAGCAAGAGAAGGAA  
AGTGCGAGGGCTCGGCTGGGACGTATGCGCCCTTGAAACGCAACATGGAGTGG  
AGCAAGATTATGTGACGTTCTTGAGCTGGTAGGGATCCCAAGAAATTCATCAAGA  
ACAGCTAATGGGGGAAAACACGTGGAGTTCATCAGTGTAGATAGGTGCCCTGAG  
GAAAATGGTGGTCCTTACAAGGCGTCGATCCCTCTGAGGCAAGCGACCAATCCA  
GACGCAGAAGTGCTGCTGGCGTATGAAATGAATGGCGAGGTCATCAGCCGAGAT  
CACGGGTACCCTATTCGTGTGGTCGTCCCCGGTGTAATTGGGGCGCGATCGGTCAA  
GTGGCTAGATTTCGATCAAGATAATTGACGAAGAATGCCAGGGATTCTTCATGCAG  
AAGGATTACAAAATGTTCCACCCATAGTTGACTGGCACAACATAATTTGGCCCA  
CCAGGAAGCCTCAAATGGACTTTCCCGTTCAGTCTGCCATCTGCTCACTGGGGGA  
TGAAGACGTTGTGGACAAGGACAAGATAACAGTCACCGGGTATGCCGTCTCTGGT  
GGGGGCAGAGGGATTGAACGTGTTGATATTTCAAGTTGACGGAGGGAAGACGTGG  
ATTGAAGCTAAGAGACAACAGAAGCCAGGTGTCGCCTACGTGGCAGATGGTGT  
GACAGTGACAGGTGGGCGTGGGTCTTTTCAGCGCTGAAGTCGATGTATCCCCGG  
ACATGGAGATTGTTGCTAAAGCTGTGATTGGCGGGCGAATGTGCAACCAGAAGA  
TGTGGGGCCCATATGGAATCTAAGGGGGATCCTGAACACATCATGGCATCGCATT  
CGCGTCCGTAGGGTTCCACGGCGCCACGTGGCTGGACTTGGTCATCCTAGATTATG  
A

### *LtAPS1*

ATGGCGATGGCCGCGACGAGCATCTCCGGTGTTGCGCCTCGTTTTGGCTCTGCCG  
ATTCTACCAGCAATCGACCTGCGAGCGGTGGAGCGACGTTCTTGAGATCTTCGAA  
CAGGAATTTGTCTGCCGCATCGTCTTCGCTTGTTGCAGGAGAGTTGCGGATCTCGT  
CGTCTGAGTCTCGACGCCGTGGGAATGCGTCCAGCCCCCGGGCGCCGATCGTCGT  
TTCACCGAAGGCTGTTTCTGATTCCAAGAGTTCACAGACTTGTCTCGATCCCGAG  
GCCAGTAAGAGTGTTTTGGGAATTATCCTGGGTGGTGGAGCTGGAACCTCGCCTCT  
ACCCATTAACCAAGAAGAGAGCGAAGCCGGCAGTTCCTCTAGGAGCAAACCTAC  
CGACTGATTGATATTCAGTCAGCAACTGCTTAAACAGCAACATCTCAAAGATCT  
ACGTGCTCACGCAGTTCAACTCTGCTTCTCTTAACCGTCACCTTTCTAGGGCTTAT  
GGTAACAACATTGGGGGATACAAGAATGAAGGTTTTGTCGAAGTCCTCGCCGCC  
CAACAGAGCCCAGAAAACCCTAACTGGTTTCAGGGAACCGCAGATGCTGTTAGA  
CAGTACTTGTGGCTATTTGAGGAGCACAATGTGATGGAATTCCTTATTCTTGCCGG  
GGACCACTTATACCGTATGGACTATGAGAGATTCAATCAAGCCCACCGGGAAAC  
TGATGCCGATATCACGGTAGCAGCCCTTCCCATGGATGAAAAGCGGGCCACCGC  
CTTTGGACTCATGAAGATCGACGAAGAAGGGCGGATAATTGAATTTGCGGAAAA  
ACCCAAGGGAGAGCACCTCAAAGCAATGAAGGTCGACACGACAATATTAGGTC  
TGGATGATGAGAGAGCAAAGGAGATGCCTTTCATTGCGAGTATGGGTATTTATGT  
TGTTAGCAAAGATGTGATGCTTAACCTTCTTCGTAACGAGTTCCTTGGAGCTAAT

GACTTTGGAAGTGAAGTCATTCCTGGAGCCACTTCTGTTGGATTGAGAGTTCAAG  
CCTATTTGTTTCGACGGGTATTGGGAAGATATCGGTACCATTGAAGCATTCTACAA  
CGCGAATCTCGGGATCACGAAGAAACCAGTCCCGGATTTTCAGTTTCTATGATCGT  
TCGTCTCCGATCTACACCCAACCTCGATATCTTCCGCCGTCCAAGATGCTGGATG  
CTGATGTCACCTGATAGTGTATCGGGGAAGGATGCGTGATTAAGAAGTCAAGA  
TTCACCATTCGGTCATCGGCCTCCGCTCTTACATCTCCGAAGGCGCAATCATAGA  
AGACACTTTGGTGATGGGAGCCGACTACTACGAGACCGACGCGGACAAGAGATT  
TCTTGCCGCTAAAGGCAGCGTTCCGATCGGCATAGGCAGGGACACCCACATCAA  
GAAGGCGATCATCGATAAGAACGCCAGGATCGGAGAGAACGTGAAGATTGTGA  
ATGCAGATAATGTACAGGAAGCAGCAAGAGAGACGGATGGGTATTTTCATCAAG  
AGCGGCATCGTGACTGTTATCAAGGATGCGCTGATCCCAAGCGGAACCATCATC  
TGA

### *LtSSS1*

ATGGCGTCTCTAGGGAGAGCAGGACCTCTCTCTTGCTTTCTCGAGCGATCGAGCG  
ACAAGCGTTCCTGCATTCGGGGAAGCCGCGGGAAGCTCCAATCCTTCGGATTCTC  
CGCGCTCGCTCGCCGCGGATCTAGCACGCTTGATCTGAAGATTCTGAGAGCGCGC  
GCCGGAGATGATTACAGAGGTGTAGGCAAGAATTTGCGTACATCCGCGATCGGG  
AAGAAAGGATCTCCCGGGGAGGAAGGAGGCGGCGACGGCGATTTGAGCGACGT  
CGACGAGGCGCTGAAGGTGACCATCGAGAAGAGCAAGAATGCGCTCGCCGCAC  
AGAAGATCCTCCTTCAACAGATCGTGGAGAAGAGAAAAAGCGCGAATCCAGCA  
GAAAAAGGCGTCGGCCACAGCGGAAGAAGTTCATCCTCAGCTTCAACCAGCGG  
GAGATCCAAGAAGAGCGAGAAGAACTTTCTTTCTCCTCGAAGGTTGCAGACGA  
CGCCCCCGCGATCAGACTGGAGTGGAGATCGCGGTTGTCCAAGGAACAACCTC  
CATCGCCGAATCTCTTGGTCTGCTGAGAGAAGTTGATCTGGAGATCTCCGATTCC  
ACGAAAATTTTGATTCTTACCCGAGGAAGATGATCCAGAAAAGAACCAAGGA  
AGTCTGGAGGAGGATGAAGAACAGAATGCAGATGTTCTGCGGAACAACAAGA  
CGTAGAAGCGCCGCCCTCTGGCGGGGGAAAATGTGATGAATATCATCTTGGT  
CGCTGCGGAATGTGCTCCGTGGTCCAAAAGTGGGGGCCTTGGAGATGTTGCAGG  
GGCGTTACCAAAGGCCTTGGCCAGACGAGGCCATAGAGTTATGGTTGTGGTGGC  
ACGGTATGGGAACTACTCGGAATCCCAAGACATAGGAGTTCGCAAGTACTATAA  
AGTTGACGGCCAGGACATGGAGGTGACCTTCTTCCACGCCTACATCGATGGCGTT  
GACTTTGTCTTCTCAACAGCCCTATCTTTCGCCACCGTGAGAATGCCATCTACGA  
GGGGAACCGTGTGGACATTTTGAAGCGCATGGTCCTGCTCTGCAAGGCAGCTGTC  
GAGGTGCCGTGGCATGTGCCATGCGGGGGGGTTTGCTATGGGGATGGGAACCTG  
GTGTTTCATCGCCAATGACTGGCACACGGCGCTGCTCCCTGTCTATCTTAAGGCCT  
ACTACCGGGACCACGGCCTCATGAAGTACACTCGCAGTGTTCTTGTATCCACAA  
CATTGCCCATCAGGGACGTGGGCCGATGGAGGACTTCGGGGTCATCGATTGCTC  
GGCCACTACACAGAGATGTTCCGCACTTACGACCCAGTGGGTGGGGAGCACCTG  
AACATTTTCGCGGCCGGGCTCAAGTCCGCTGACCGGATTGTCACTGTTAGCCACG  
GGTATGCCTGGGAGGTGAAGACGTCTGAGGGCGGGTGGGGCCTACACTCTGTGG  
TCAACGACAACGACTGGAAGATCTGTGGAATAGTCAATGGCATTGACACTGCTG  
ACTGGAACCCGTCCACGGATTCCCATTTAGGATCTGAAGACGGGTATGTAAATTA  
CACAGTGGAGACGGTCAAGGAAGGGAAAGCCAGTGCAAGGCGGCGCTGCAGC

AGGAACTGGGCCTGCCGTCCCGGCCTGAGGTTCCCTTAGTGGGCTTCATCGGGCG  
GCTGGACCACCAAAAGGGCGTGGACATTATTGCAGAAGCAATCCCGTGGATGGT  
GGCGCAGGACATGCAACTGGTGCTGCTGGGCACAGGCCGGGCCGACCTGGAGG  
ACATGCTCCGGGGCTTCGAAGCCCAGTACAGGGATAAGGTGCGCTCGTGGGTCG  
GTTTCTCCGTGCGGATGGCCCATCGGATCACGGCAGGGGCGGATGTGCTGCTGAT  
GCCATCGCGGTTTGAGCCGTGTGGGCTCAACCAGTTGTACGCGATGGCCTATGGG  
ACTGTCCCAGTGGTGCATGCCGTGGGTGGGCTGAGAGACACGGTGCAGCCCTTT  
AACCCGTTTGAGGAGACTGGCCTGGGGTGGACCTTCGACAGGGCTGAGTCTGGG  
AAGCTGATCCATGCGCTGGGCAACTGCTTCAACACCTTCTGGAATTACAAGCAG  
AGCTGGGAGGGGCTGCAGCGTCGGGGCATGACGCAGGACCTCAGCTGGGACCA  
TGCTGCTCAGCTCTATGAGGAGGTCCTTGTGCTGCCAAGTTCAGTGGTGA

### *LtGBSS1*

ATGGCCTCTGTCACTATTTCAAACGTTGTCTCGGGAAGTACTCATGGTGCCTGTG  
ACGTGGAGCAAAGAAAATCGGGTAACAGGAAGGGTGTATCCCTGAGAAGTCAG  
ACGAACGCGTTTCATGGACTGAGGTCCCTCAACAAGGTGGACTCGTTTCAATCAC  
CAAAGAACCGGAATTCAAGCTTCGCACGAGCTCTTACGAAAGGCGTCCAGCCTG  
GGAAATCCAAACATTCTGGCACTGTGCTTTGCTCGGGTGGCAAGTCCATAGTCTT  
CGTATCGACTGAAGTTGCCCCATGGAGCAAGACCGGGGGTTAGGTGACGTTGT  
CGGTGGATTGCCTCCTGCCTTGGCGGAAGTACTAGGCCACCGTGTGATGACCGTATCC  
CCTCGCTATGATCAATACAAGGACGCATGGGATTCTGCTGCTGCTAGAGCTTG  
AAGTGGCGGGCAAAGTGTACACTGTTCTGTTTCTTCCACTCCCACAAAAAGGGCGT  
GGATCGCGTCTTTGTTGACCATCCTTTGTTTCTGAGAAAGGTGTGGGGCCAAACC  
GGAGGAAAATTGTATGGCCCTGTGGCTGGAGAAGATTACGAAGACAACCAGACT  
AGGTTTATACTTCTCTCTCTTGGCCGATTGGAAGCTCCTCGTATTCTAAATTTCAA  
ACCTAGCGGATCCTTTTCTGGGCCTTACGGGGAAGATGTTGTCTTTGTATGCAAC  
GATTGGCACACTGCAGTCCTACCCTGCTACTTGAAGACCTTGTACAAGTCGCACG  
GTATTTACAAAAATTGGAAGGTTGCTTTCTGCATCCACAATATTGCCTACCAGGG  
AAGATTTCCCGCCTCCGACTTCTCACAACCTCGGTCTCCCGGACAGCTTCAAGAGC  
TCATTGATTTTATTGATGGATATCTAAAGCCTGTGAAGGGGAGGAAAATAAACT  
GGATGAAAGCGGGAATCAAAGAATCGGACATGGTTCTGACAGTCAGCCGATTCT  
ACGCCGAAGAGCTGATCTCTGGCGTCGCCAAGGGCGTGGAGCTGCACAACGAG  
ATTCAAGAGGCGGGCATCCTCGGGATCGAAAACGGGATGGACGTAGACATCTGG  
ACCCCAAAAAGTATGATAAATATATCTCGGCGAATTACGATCCTGCAACGGTGCTC  
GAGGCAAAACCCTTGAACAAGGAAGATGTGCAGGCATCCCTCGGGTTGCCAGTG  
GACCCCAACGCCCTTCTCTTGGCTTTTATTGGCCGGCTGGAGGAGCAGAAGGGTT  
CGGACATTCTTGCCGAAGCCATTCTTAAATTCATCGGCAAGAACATCCAGATGGT  
CGTCCTTGAACGGGGAAGAAGGCGATGGAGAAGCAATTGAAGAAGATAGAGG  
AGGCCTATCCAGAGAACGTGAGAGCAGTGGCCAAATTCGACCCTATTCTGGCCC  
ACAAACTGTTTCGCTGGCGCAGATCTGATGGTTATTCCCAGCAGATTTGAACCCTG  
CGGTATTGTTCAACTACAAGCCATGAACTACGGCACGCCGTCTCTGGTTACGAGC  
ACCGGCGGACTGGTGAACACGGTGGTGGACGGGTACACAGGCTTCCACATGGGA  
GCTTTCAACATCGATTGTGACGCAGTGGACCCACAAGACGTGGAAGCGATCGTG  
TCGGCTGTAAACCGGGTCAGTGAAGTTTACGGCACGGAGCAGTTTACGGAGATC

ATTCAGAATTGCATGGCCCAGGACCTCTCCTGGGAGAAGCCCGCTAAGAAGTGG  
GAGAAGGCGCTACTGGGCCTCATCTCCGGTGAAGACCAGCCCGAGGAGGCTGCG  
GAGCCCACCAAGGAGCTGGCCGCTGCTTGA

### *LtAPL1*

ATGGCGAGAAGTTTTCTGTTCGACATATGGCTTCGTCTTCTTCTGCCAGCGACCGG  
CATGTTTCATCTTGGCCATGGCGGAGGAAAGAGAAATTTACAAACCCAAGCTAC  
GGTCCACCTTCTGGACAAGCTCCTCCAATGGAGGAATTTCTTAGAGAGAGAATCT  
CCGGATCCTGGCCGGAGAATGCTCGTTGCGGCGGCGGTCTGCTTCCTCGCCGCCG  
CCGTGTCCAGCGCCCGGTGGAGTCGGCGGCGGGTCTGCTGTTCTCCCCATACTTAA  
CCTTGTCGCCGGAATCGAGCTCAAGACAGCTTCGAAGTTCTCAGCTTTCATGGTC  
GCCGGAACCGCCGTTTCCAACGTCATGTACAGCGTCTTCTCCGGCGCCGGCGCCG  
GCGGCCAGCATGTGATCGACTACGATATCGCCTTGCTCTCAGAGCCCTGCATGTT  
GCTGGGCGTGACCGTCGGAGTCATCTGCAACGTGGCGTTTCCGGAGTGGCTGGTG  
ACGCTGCTCTTCGCCGTCGTTCTCTCTCTATCCACCATTAAACTTGCAGAGCCGG  
AGCTCGGAAGTGGAAGGAGGAGTCGGAGGGGATGAGAGGGAAGAAGGACGAG  
AGAAGAGAAAGTGTTAGTGAGAGAGTGAACGACTTGGAAGAGCCTCTTCTAGA  
GGATGAGAGAGAAAGTCCAAATAAGACGAAGTTGAAGAAGGTGGGAGTTCTGG  
TTTTGGTCTGGTTCTGCTTCTTCCTCCTTCAATTCCTCAGACAAGGCAATGGATCA  
AAGGGTGTGATTAACATGGAGAGATGTGGAGTTGGGTACTGGCTCATCACCGTA  
TCCCAAGTCCCAGTCGCTCTTCTTCTTCACTACCTATATGCTCTACGCAAAGGATCA  
GGAGCAGAGACGGGGGTACAGCCAGAGAGACGATTTGAGACGGTGATCGATA  
GTCTACCCAAGATCATATTCCCAGTTGCAGCCCTCATGGCCGGGGTTCTCGGTGG  
GCTCTTTGGGCTCGGCGGTGGACTCCTGATGAACCCTGTTCTTCTTCAGGTGCGCG  
TACCTCCTCAGATGACGGCAGCAACAAGCTGCTTCATGGTCCTGTTTTCTGCGTC  
AATGTCGTCGGTGCAGTACTTGATGATGGGGATGAAGGAGATAAGACAAGCTCT  
GATCATGGCGGCGGGATGTGGTCTGAGTTCATGGCTGGGGTTGTTCTTGTGGAG  
AAAGCCGTCGTAAAGTACGGCCGAGCTTCGCTCGTCATCTTCTCCCTTGGCACAG  
TGATGGTGTGAGCTCCGTCTCCATCACTGGCTTTGGAATTGTCGACATATGGAA  
AGACTATGTCGATGGTAGAAATCTTGGGTTCAAACTTCCTTGTTGA

### *LtISA1*

ATGGATCATGCCCTGGCGATGTCGAGCTTGCGGGCCTTCACCAGCGGCTGCCATA  
ATCGCCGAAATTCAATTACTTCGATTGTCGCATTTGCCTTCGCCCCGGGGTTCTGG  
AGCGCCCCCTTCGAGAAATGAGAAGGTGAATGCGAAACGTTTGACCGGTAACAGG  
AGAGCGGAGTCCATGGTGCCTCTTCTGTGTCAGAGCCACGGGTGTCACTGAGGTGG  
CGGAGAACGTTGGTGTTCAAAGAGGTTTCATCTTTCGGACTCGTCGTTGAAAATGG  
CTCTCCAGAGCCCCCTTGGCGCCACCGTTCTGTTGGTGGAGTAAATTTGCCATCT  
TTTCAAGCGGAGCGACATCAGCTTCCCTGTGCCTCTTCAGCCTCGCCGACCTGCA  
AGCGAATAAAATAACGGCGGCTATACCTCTTGATCCGGTACTGAACAAAACCTGGA  
CATATATGGCATGTATTTGTGGAAGGAGGGCTCCATGGCATGCTCTATGGGTACAA  
ATTTGACGGGGTCTTTTCCCCCTCAAGATGGGCATTACTTTGATTCATCCCTTATTTA  
GTGGATCCATATGCTAAGGCAGTTGTAAGTAGAGATGAGTATGGCATCCCAGGAC  
CTGGAGGCAACTGCTGGCCTCAAATGGCTGGCTTGATACCCTCTCCTCATGATGA

GTTTGATTGGGAAGGAGATCTACCGTTATCTTACTCTCAAAGAGACCTTGTAATCT  
ACGAAATGCATGTCCGTGGGTTTACACGGCATGATTCCAGTGGTACCAAGTATCC  
AGGAACATATCTTGGAGTGACAGAGAACTTGACCATTTAAAGGAGCTTGGGGTC  
AACTGTATAGAACTGATGCCTTGCAATGAATTTAATGAACTTGAGTACTTCAGCCA  
TAACTCTGCCACAGGAGAGAAAAAATTTAACTTCTGGGGTTATTGACGGTTAATT  
TCTTTTCACCGATGATAAGATATTCATCAGCTGGTTCGGAGAACAGTGGCCTTGAA  
GCAATAAATGAATTCAAGTATCTTATCAGAGAAGCCCATAAACGTGGCATAGAGG  
TACTCTTGGATGTTGTATTTAATCACACTGCTGAAGGGAATGAGAGAGGCCCCATT  
TTGTCATTTTCGAGGTCTCGATAACAGCGTTTATTATATGATTGCACCAAAGGGAGA  
GTTCTATAACTACTCGGGATGCGGAAACACTTTCAATTGTAATCATCCTGTCGTTTCG  
ACAGTTCATCGTGGATTGTCTAAGATACTGGGTGATCGAAATGCACGTGGATGGAT  
TTCGTTTTGATCTCGCATCAATCATGACCAGAGCCTCCAGCCTTTGGGATGCCATT  
AATGTACACGGAAATCCAATTGAAGGCGACAATATAACCACTGGCACGCCTCTGA  
GCAACCCTCCATTGATTGAAATGATCGCCGAAGATCCAATTCTCAGTAAAGTGAA  
GCTCATTGCGGAAGCATGGGATGCCGGGGGTCTCTACCAAGTAGGAAGCTTTCCT  
CACGGGGGAGTGTGGTCAGAATGGAATGGGCAGTACCGAGACGTCGTACGGCAA  
TTCATAAAGGGAACAGATGGGTTCCGCCGGGGCTTTCCGCCAAATGCCTGTGCGGGA  
GTCCCGATCTATAACCAGGATGGAGGAAGAAAACCATGGCACAGCATCAACTTCGT  
CTGCGCGCACGATGGCTTCACTCTGGCGGACTTGGTCAGCTACAACAACAAGAA  
CAACTTCTCCAACGGGGGAGAACAACAACGACGGCGAGAATCACAACAACAGCT  
GGAAGTGCAGGACAGGAGGGGAGAAACGGCTGCGTTGCAGGTGATAAGGTTGAGG  
AAGAGACAGATGCGGAACCTTCTTCCTTTGCCTGATGGTCTCCCAGGGAGTGCCGA  
TGATCCTGATGGGCGACGAGTACGGCCACTCCAAGGGCGGGAACAACAACACCT  
ACTGCCACGATAATCACCTCAACTATTTCCGGTGGGATCAGAAGGAGGAATCTTC  
GCGGGATTTCTTCAGATTCTGCCGCCTGATGACCCGATTCCGCCGGCAAGTTATAA  
GCAGATCCATCCATCTTCCTCGGCTCTTTCCTGTTTATTGA

### *Lta-Amy1*

ATGGGGGAATTTCTGATATGGAGGTCATCTTCCGCGGCTGGTCATCTCTCCGTTCA  
ACAGTCTGGACGGGAGAGTTTCAAGTTCATCTTTCCTCGAGATCCTGGCAAGAGA  
GGGAGATTCTCTCGCTTGGGGTACAATCACAAGACATCAGCGCTCTCAGGATCCA  
CAGGATGCCTTCATTGCCGGCATAATCCGCTCAGAGTTCGTCCGATCAGAGCTGG  
CATCGCTGAGACTCCAATTGCTGAAGCTCCAGATGCCAACAACACGGACGCCCT  
GTTCAAGCAGACATTTCCATTGACGCGAACGAAATCTGTGGAGGGTAAGGTATCG  
GTGAGGTTGGAGAAAAAAGGCGATAATGCTGAAGGAAATCGATGTTTGACCATT  
CGATGCAACCTCGAAGGGAAGTGGATTCTTCATTGGGGTGTGACGTACATTGAAG  
AGGCGGCCAGTGAATGGGATCAGCCCCCTCTTGACATGAGACCCCCTGGTTCTAC  
TCCCATAAAGGACTATGCTATTGAGACGCCCTTAAAGAAATCCTCTTCTGCGTCAG  
AAGGAGAGATACTGTATGAATTGCAGATAGATGTGAAACCTAATCTCTCTGTTTCA  
GCCATTCATTTTGTCTCAAGGATGAGGAAACAGGAGCTTGGTTTCAGTATAGAG  
GGAGAGACTTCAAGGTTCCCTCTTCTCATGTGGGAAGATGATGAGATCGTCAGTGG  
GAAAAAAGGCTTCAGCATTGCGCCAGATGAATCGACTATGAAGGCGAACGAGAA  
AGAAAAAACCGAAGCCAAACGAGAAGTGAAGCTTGTGGAGGAGTACATTGAAA  
AGTTTCCAATAGTACAAGAGGAGACATTTCAGAATTATCTCACAGTTTCAGTGAG



AAGAAATGACGAATTGGATAAAAATGTGGTGCATTTTGACACCGATATACCAGGC  
CACGTAATTATTCACTGGGGAGTCTGCAGAGATGAAAATAGAAACTGGGAAATTC  
CAACGCCGCCATATCCAATGGGTTCAAGAGTATTCCGGGGGAAGGCTTTACAAAC  
ATTACTTCAGCCTAAGGCAAATGAGAGTGGAAATTGGGGAGATTTTGTCTGTAAT  
GATGAATTTGCTTGTCTCCATTTTCGTTATAAAGCTAAACGAGTACAATTGGTTGAA  
CAATGTGGGGGATGACTTTTATATCCCTCTCATGACTGAGAGCAGTATACAAGCTA  
AGTCTATAATGACCAAAGCGCAAGATATCCTAAAACAAGTCATGGATTCTGAATC  
TGAGGCTACTTCATCAATGGAAGTAGAAACAACCCAAGAAGTAGAAGCTGTCTC  
CTACACTGATGACATCATCAGTGAGATAAGGAGCCTGGTAACAGACATATCTGCC  
GAGAAAGGTAACATTACGAAGAGCAAAGAAGCACAGGAAAATATCCTTCAAGA  
GATCGAGAAACTGGCAGCTGAAGCCTATGGAATTTTCAGAAGCTCGATTCCATTA  
TTCGTCGAGGAGCCTGTTTCTGATGCGGATTTATTTAAGCCATCTGTACAGATATCT  
TCGGGAACAGGGACTGGTTTTGAAATACTTCTTCAGGGATTTAACTGGGAAGCTC  
ACAGATCTGGAAAATGGTATGGTGAGCTCTATGCGAAAGCTGAGGAGATAGCCGC  
AATGGGTTTCACGACAATATGGTTGCCTCCTCCGACGGAATCTGTGTCCCCTGAAG  
GGTACATGCCCAAGGATTTATACAACCTGAATTCGAGATATGGAAATACTGAAGA  
GTTGAAGAGCCTTGTAAGAAGTTCACGAAGTGGGCATTAGGGTTCTTGGTGAT  
GTGGTCCTGAACCATCGTTGTGCTCATGCCCAAATAAAAATGGCGTGTGGAATG  
TCTTTGGTGGCCGCTTGGCATGGGATGATCGAGCTATTGTTTCTGATGATCCTCATT  
TTCAGGGTAGAGGCAACAAAAGCAGTGGAGATTTCTTTCATGCGGCTCCAAACAT  
TGACCACTCACAGGAATTTGTGAGAACGGATATAAAAAGAATGGCTCTGCTGGCTG  
AGGGAAGAAATTGGATATGACGGCTGGAGATTAGATTTTGTGAGGGGCTTCTGGG  
GAGGCTATGTAAAGACTATCTTGAAGCAAGTGAGCCCTATTTTGCGGTTGGAGA  
ATACTGGGATTCTTTGAGTTACACGTATGGTCAGATGGACTATAATCAAGACGCTC  
ACAGGCAAAGAATCATTGATTGGATTAATGCCACCGGCGGAAATGCTAGTGCATT  
CGATGTGACCACCAAAGGGATTCTTCATGCTGCTCTGGAAAAATGTGAGTATTGG  
AGATTATCGGATGAAAAAGGAAAGCCGCTGGTGTGATGGGATGGTGGCCATCA  
CGTGCCGTCACATTCATAGAGAACCATGACACTGGCTCTACTCAGGGACATTGGA  
GATTCCCGTCAGGGAAGGAGATGCAGGGGTACGCATACATCCTGACCCATTCCGG  
GACGCCGACGGTCTTCTACGACCACATTATCTCCCACTACCAGCAGGAGATCGCC  
ACCTTGATATCTCTCAGGAACCGCAACATGATCCACTGCCGCAGCACTGTGAAGA  
TAAAGAAGGCGGAGAGGGACGTGTACGCGCGGAGATCGATGAGCGAGTAGTG  
ATGAAAATGGGCCCCGGTTACTACGAGCCCCGAGGGCCCCACAATCCTGGTCTGTGG  
CCGCCGAGGGCCGAGATTACAAGATCTGGGAAGCGGCTTGA

### *Ltβ-Amy1*

ATGGCCACGGAGATGGAGAAATTAGGAGAGACGAGCGATGAGGATGAGGAGGA  
CATGGACATGGACGTGAAAGAAGAGGACGATGACGACGACGGCGAGGAGAGTG  
ACAAAGGCGCGTACAGCGGGGGAATGATGATCGCAGGCGCGTTGGCGGACGGG  
GAATTCGGTAATAGCCTGGGGAACCGATTCCAGCAGCAACAACATCTTCAGATCT  
GCATTTCCGACGGAGATCAGCAGCAGAATCAGCAGGCGATGGCGATGGGCGCAG  
GCATCAGCGGCAGCGGGATGAGGAGATGCCGTCCGAAAGAGGAAAAAGAGAGG  
ACGAAGCTCCGGGAGAGGCATCGGCGGGCAATAACCGCGCGCATTCTCTCAGGC  
CTCCGGCGGCAGGGCAACTACAACCTCCGCGTTAGGGCGGATATCAACGAAGTC

ATCGCCGCGCTCGCCAGAGAAGCTGGCTGGACTGTCCTCTCCGATGGCACACCT  
TCCCCGCAAGGGCAAACCTCCCAGTTGCTGCAGACGGGTAGGCCTCCGGGAACGC  
CACCGGCATCAATGCCGTCATCGTCTCCGGCACAGAACCCGGCGCCATTGCGAGG  
AGTCTATGGGGCCGGAGGTTCGATCCACCGACTTCCGATCCTGCCAGATAAAGGGT  
GTCTATGCCTCCAGCCCAAGTGAGATAACCCGGCCGTCTTCGAGCGTCATCGATGAT  
AAGAGCCGAGAGCAGAGGAGGAGAGAGATGCGGAGGATTCTCCTCATCTTG  
GCACCTGCATCGATGGAATCGATGATAAGCAGAGGATGGATGCCTCTTCCAGAAT  
GCAAGAGCGAGATTTGCGCGACACGCCTTACGTTCCCGTATACGTGATGCTACCCT  
TGGGGGTCATCAACATGAAATGCGAGCTCGTGGATCCGGATACGTTGGCGAAACA  
ACTGAGAATACTCAAGTCCGCCAACGTTGATGGCGTGATGGTTGATTGTTGGTGG  
GGGATAGTTGAAGCGCATACTCCACAAGAGTATAACTGGCAGGGGTACAAAAGA  
CTTTTCCAAATTGTTTCGTGACATCAAGCTTAACTTCAGGTGGTTATGTCGTTTCAT  
GAATGTGGGGGCAACGTTGGGGATGATGTTTTTATCCCGCTTCCACGATGGGTGTG  
TGAAATTGGGCAAAGCAACCCTGACATTTTCTTCACAGATAGAGGTGGAAGACGT  
AACACTGAAAGCCTTACGTGGGGCATCGATAAGGAAAGGGTTTTAAGAGGCCGA  
ACTGCTGTTGAGGTTTACTTTGACTTTATGAGAAGCTTCCGTGTGGAGTTTGATGA  
GTTCTTTGGAGATGGAGTGATTTTCGGAGATTCAAGTGGGATTAGGTCCATGTGGAG  
AGCTACGGTATCCATCCTACCCCGCGAGACATGGTTGGAGATACCCTGGCATAGG  
AGAATTTCAGTGTTACGACAAGTACATGATGAAAAGTCTGATGAAGGCAGCAGA  
AATGAGGGGTCATGTGTTCTGGGCAAAAGGGCCAGATAATGCCGGCTCGTACAAT  
TCTTCACCGCATGAAACTGGGTTCTTTTCGTGATGGAGGAGACTACGATAGCTACTA  
TGGTAGATTCTTCCTCGGATGGTATTCTAGGTTTCTAACAGATCATGCAGATCGTGT  
GCTGTCACTGGCTAAATTGGCTTTTGAAGGCAACCACATTGCTGCAAAGGTGTCG  
GGCATTCAATTGGTGGTACAAAACAGCCAGCCATGCAGCCGAGTTGACGGCCGGTT  
TCTACAACCCTTGTAACCGTGATGGATATGCCGTGATTGCCGAAACCCTCAAGAA  
GCACGACACGGCTTTAACTTTACATGTGTTGAATTACGAACCCTAGACCAGCAT  
GAGGACTTTCCGGAAGCACTCGCAGATCCGGAGGGGCTTGGTCTGGCAGGTGCTG  
AATGCAGCATGGGATGCTCGGATACCGGTTGCCAGTGAAAACGCACTTCCATGCT  
ACGATCGAGAAGGGTATAATAAGATACTAGAGAACGCGAAACCCTTCGATGATCC  
AGATGGAAGGCACTTGTCCGGCGTTCACGTACCTTAGACTTACCCCGATTCTCATGG  
AGGCACAGAATTTTATTGAATTTGAGCGCTTTGTTAAGAGAATGCACGGTGAAGC  
AGTTCTTGACTTCCCCATGTGA

#### *LtPFK1*

ATGGCAGCCGAAGCGCAAACAGCCGTCCAGGATGAGAGAAAGAGAGAGAGGG  
AAAGAGGGGAACCCTTCAAAAACTATCCCTTCTACTGAGCATCATCCTCCTAAT  
AGTGGGCGCCGTGGGAGCACCTCTCCTCACCCGTATCTACTTCTTGATGGGGGA  
GCTAGGGTTTGGGTACGGCCCTTGCCCAGTTTGTGCGCTTTCCACTATTCTACC  
CTTCATTTGCGGCTCCTACGCCCACAGAAGCCGGCGCGGAGATACAAGATTTTTC  
GTGCTCTCGGCTAAGGTCATGGTGGCGTCCTTAGGCGTCGGAATAATCGCTGTCTC  
AGACGCCTGGTTGTACTCCTACGGGCTCATGTCCCTTCCACTTTCTATCTCTACGCT  
GCTTATTGCCACGCAAATAGTGTTACGGCGCTGTTGCGCTTCCTCCTGGTAAGGC  
ACAAGTTCACGGCTTTCTCCGTCAACGCTGTTGTCCCTCCTTGTAATCGGCACGGTA  
CTGCTGGGCGTTCAATCCAACCTCCGAGAGGCCTCCCGGAGAGTCAAACAAGAAG

TATTACATAGGGTTCTTCGCCATGATCGCCGCGGCAGTTCTCTACGGATTGATAATG  
CCACTTATCCAGTGGGTCTACGTAAGATTCAAGCAGAGGGAGTCCCTCTCCTCTGT  
TCTAGAGATGCAGATCCTCATGTTCGATCACCGGCAGCGTGTTCTCCTTGATCGCCA  
TGGCCATTAACCACGACTTCGCGGCCGTTTCTCGGGAGGCGGAGATATACGAGCT  
GGGAAAAGCAAAGTACTACGCGGTTTTGGTGGGCACGGCGATCTTCTGGCAGAT  
GATGACTATAGGTTTCTTAGGAGTGATCGCTTGTTCCCTCCGCTCTCCTCGCGGGAG  
TCGTCGTAGCCATGCTCCTGCCGGTAGGAGAGATCGTGCCGGTTCTGCTTCTGGGA  
GAGAAATTCACCAGCGCAAAGGGAGTCGCCACGGCCTTATGTCTATGGGGATTCA  
TCTCCTATCTCTACGGTGACTTCCGGCAGACGAAAAAGAAGCCGGCAGCGCCGTC  
AGACGACTGCCGCGTTTAG

### *LtFBA1*

ATGTCTGCTTACCGCGGGAAGTATGCCGATGAGCTCATTAAGAATGCGGCCTACAT  
TGAACTCCCGGAAAGGGCATCTCGCCGCCGACGAATCCACCGGCACAATTGG  
CAAGCGCCTATCCAGCATCAATGTTCGAGAATATTGAATCAAATCGTCGTGCCCTCC  
GTGAGCTCCTCTTCACCACTCCTGGCGCACTCCAGTACATTAGTGGCGTCATCCTC  
TTCGAAGAAACCCTTTACCAAAAAACTGCTGCTGGAAAACCCTTCGTCGACCTTC  
TAACTGAATCTGGCGTACTCCCTGGCATCAAAGTTGACAAGGGCACCGTAGCCCT  
TGCTGGCACCGACGGTGAGACAACCAACCAAGGTCTCGATGACCTTGGCAAGCG  
CTGTGCTACCTACTATGCCGCCGGGGCTCGCTTTGCCAAGTGGCGGGCTGTGCTCA  
AGATCGGCCCCACCGAACCCTCCCAACTAGCCATTGAGGAGAATGCCAATGGCCT  
TGCTCGCTATGCCATCATCTGCCAGGAGAACGGCTTGGTGCCTATTGTAGAGCCCG  
AGATTCTTGTTGACGGGACCCACGACATTGCGCGCTGTGCTGCCATCACTGAGAC  
TGTCCTTGCTGCTTGCTACAAGGCGCTCAACGACCACCATGTTCTTCTAGAAGGA  
ACTCTCTTGAAGCCTAACATGGTAACTCCCGGGTCGGACTCCAAGAAGGTGGCAC  
CGGAGGTGATTGCAGAGCACACTGTACGAGCCCTCCAAAGGACCGTCCCTGCAG  
CTGTGCCGGCAATCGTGTTCTCTCCGGCGGGCAGAGTGAGGAAGAGGCGACAC  
GGAACCTCAATGCCATGAACCAGCTCAAGGGGAAGAAACCGTGGAGCTTGTCAT  
TCTCGTTCGGGAGGGCTCTTCAGCAGAGCACTCTGAAGGCGTGGGCAGGTAAGG  
TGGAGAATGTTGAGAAAGCTCAGTCTGCTTTTCTTACTAGGTGCAAGGCAAATTC  
GGAGGCTACGCTCGGCACCTATAAGGGGGATGCGGCCGGCGGTGAAGGCGTCTC  
CGAGAGCCTTCATGTTAAGGACTACAAGTACTGA

### *LtPK1*

ATGCACATAGCCCAAGTCCACATCAATCTCCCCACATTGACCAATATGGACAAAA  
AGGCTATCTCAACATGGGGGTGTCGCAACAATGCCGACATCATTTCACTCTCATAC  
ACGCGTCAGGCCGAGGATGTTTCGAGAGCTTAGAGCATTTCTTACTGCTCATAATCT  
CGCCGGCACTCAGATATTTGCCAAAATCGAAAACGTAGAGGGATTGAGACACTTT  
GATGATATTCTCCGAGAGGCAGATGGAATTATTCTTTCTAGGGGTAATCTGGGCAT  
TGATCTCCCTCCAGAGAAGGTGTTTTTGTTCAGAAATCTGCAGTCTACAAGTGCA  
ATATGGCAGGGAAGCCTGCAATAATCACTAGGGTAGTAGATAGCATGACAGATAA  
CCTTCGTCCTACTCGTGCAGAAGCCACCGATGTGGCAAATGCTGTTCTTGATGGTA  
CTGATGGGATTTTGCTCGGAGCAGAGACACTCAGGGGTCTTTACCCAGTAGAAGC  
AATAAAAACAGTTCAAAGGATTTGTTTTGAGGCTGAGTCAGTCTACAACCAACCG

ATTCATTTCAAGGCTATAGTGAAGCATATCGGGGACCCAATGTCAGACGAGGAAT  
CCGTCGCCTCTTCAGCAGTTGGATCTGCGATCAAAGTCAAGGCATCAGTCATATTG  
GTCTTCACCTCCTCAGGCAGAGCAGCAAAGATGATTGCCAAGTATAGACCACCAA  
TGCCCATCATGGCCATCGTCATCCCGAAGATCATGACAAACTCTCTTAAATGGACT  
TTCTCGGGAACCCAGCAGGCTAGGCAGTGCCTTGCTGTCAGAGGAGTTTTTCCCG  
TTCTTGCCGATCTCAACTCGACGAGGACAATCAGTCCCGGCGAAGATTCTGCCCT  
GGAGCTCGCCTTGAACCATGCCAAGTCCGTGGGCTTGGTGAGCACCTACGATCGG  
GCTGTGGTATTCCAGAAGATCGGAGACTCCTCAGTCGTCAAGATCATCGAAATCC  
CATGA

### *LtPDC1*

ATGGATACGCAAATCGGATCGATCGACGGCGTGAAGCCGGCGAAAATCGATGTC  
GGCGCGCTCCCGTCGAACAACCTGCTACACTCTCAGCCCTTCCTCGACATCTCCTG  
CTTCTCCGACGGAAGCAACCCTTGCCGGCACATCGCTCGCAGGCTCGTCCAGAT  
CGGCGTTACGGACGTGTTACGGTTCCTGGAGACTTCAATCTCACGCTTCTCGATC  
ATCTCATCGCTGAACCGGGGCTAAAGAACATTGGCTGCTGCAACGAGCTCAACG  
CTGGCTATGCCGCCGACGGATACGCCAGATCTCGAGGTGTTGGGGCTTGCGCTGT  
TACCTTCACCGTCGGAGGATTGAGTATCCTCAACGCCATTGCCGGTGCTTACAGCG  
AGAACCTTCCCGTGATCTGTATCGTCGGAGGTCCCAATACCAACGATTATGGAAC  
CAACAGGATCCTCCATCACACCATCGGTCTCCCCGATTTTCAGCCAGGAACTCCGC  
TGCTTCCAAACCGTCACCTGCTACCAGGCCGTGGTGAACAATCTGGAAGATGCGC  
ACGAGCAGATCGACGCCGCGATCTCTACCGCGCTAAAGGAGAGCAAGCCGGTGT  
ACATCAGCGTTAGCTGCAATATCACCGGAATCCCTCATCCCAGCTTCAGCCGAGA  
GCCAGTGCCCTTTTCTTATCTCCTAGATTGAGCAATCCGGCCGGTCTCGAAGCTG  
CCGTTTCATGCTGCAGCCGAATTCTTGAATAAGGCCGTGAAGCCAGTAATGGTGGG  
AGGGCCGAAGCTCCGAGTAGCGAAAGCCGGAGAGGCGTTCGTGCGACTTGGCCGA  
CGTTTCTGGCTATGCCGTGCGCGTGATGCCGTACGCGAAGGGACTTGTTCCAGAG  
CACCTCCCTAGATTCAATTGGAACCTTACTGGGGCGCAGTGAGCACCGCTTTCTGCG  
CAGAGATCATTGAATCCGCGGACGCTTACCTCTTCGCCGGCCCAATCTTCAACGA  
CTACAGCTCAGTCGGATACTCCCTCCTGCTCAAGAAGGAGAAGTCGATCATCGTG  
CAGCCTGATAGAGTTGTGATCGGGAACGGCCCAACTTTCGGGTGCGTTCTGATGA  
AGGATTTTCTCGTCGCTCTGGCCAAGAGGTTGCACAAGAACTCGACGGCATTGA  
GAATTACCAGAGGATCTTCGTTCCCGGGGGAGTTCCCTCTAGAATGCAAGCCAGAC  
GAGCCGCTCAGAGTCAATATTATGTTCAAGTACATTCAGGAGATGGTATCTGGGG  
AGACGGCGGTGATCGCTGAGACTGGAGACTCCTGGTTCAATTGCCAGAAGCTCA  
GATTACCGGAGGGCTGCGGGTATGAATTTCAAATGCAGTACGGATCGATCGGGTG  
GTCTGTGGGGGCAACGCTGGGGTACGCGCAGGCGGCGAAGAACAAGAGAGTGA  
TCTCGTTCATCGGCGATGGCAGCTTCCAGGTCACGGCTCAGGATGTGTCCACGAT  
GCTTCGAGCCCAGCAGAACCCCATCATCTTCCTCATCAACAATGGGGGATACACC  
ATCGAGGTGGAGATCCACGACGGCCCCTACAACGTCATCAAGAACTGGAACCTAC  
ACCGGCCTCGTGGATGCCATCCACAACGGCCATGGCAAGTGCTGGACCACCAAG  
GTGAGGTACGAGAAGGAGCTGAAGGAGGCGATAGAGACGGCGACTGAGGTGAA  
GAAAGACTGTCTGTGCTTCATAGAGGTGATCGTTTACAAGGACGATACGAGCAA  
GGAGCTGCTCGAGTGGGGCTCCAGAGTCTCCGCCGCCAACAGCCGCCCTCCCAA

TCCTCAGTAG

*LtACO1*

ATGACGCTTTTGTGGCCGAGCGGCTCTCGCGAGGTCTTCCACCTCCCGCATCGT  
CCCGCCGGTGGCGGCGACTGCGGCGGCGGCCATGGCGGGGCGGACTTCGCCGTC  
TTCCTCTCCGCCGCGAGAGGCGCCGTCTGAGCCCCGACGGTCTCCTCCTTCTTCGC  
CGTCTCGGCATTTTCGGCGACTGGAGGTCTCCTCTGAGTCACCGCGCTCTGATCCGC  
TCTTCCGCCGTCGTGACTGAACAATTTCGAGAGGCGATTTCGCCACCATAGCTACAA  
AAAATTCGTACGAGAGCATCTTGACCTCGCTGTCTGAAGCCAGGTGGAGGCGGCG  
AGTTCGGGAAGTACTACAGCCTGCCGGCTCTTAACGATCCTAGAATCGATAAACT  
TCCATACTCGATACGGATACTATTGGAATCGGCGATCAGAAACTGTGACGAATTC  
AGGTAAAAGCAAAGATGTGGAGAAGATCATCGATTGGGAGAACACAGCTCCCA  
AGCAAGTCGAGGTCCCCTCAAGCCAGCACGTGTCCTCCTTCAGGACTTCACGGG  
TGTGCCGGCTGTTGTTGATCTTGCTGCATGCGGGATGCCATGAACAACCTTGAA  
GCGATTCAAATAAGATAAATCCTCTGGTTCCTGTTGACCTTGTAATTGACCATTCA  
GTTCAAGTCGATGTGGCAAGATCAGAAAATGCAGTCCAGGCGAACATGGAACCT  
GAATTCAAACGAAATAGGGAGAGGTTTGGTTTCCTCAAGTGGGGATCCAAAGCAT  
TCAAAAACATGCTCGTGGTCCCTCCAGGATCAGGCATTGTCCACCAGGTGAATTT  
GGAGTACCTAGGGAGAGTGGTGTCAACAACGACGGTCTTCTTTACCCTGATAGT  
GTTGTTGGTACCGATTCACATACAACGATGATAGATGGTTTGGGAGTCGCCGGGTG  
GGGTGTTGGTGGCATCGAAGCAGAAGCTGCAATGCTTGGGCAGCCAATGAGTATG  
GTGCTGCCTGGAGTGGTTGGATTCAAGCTATCAGGGAAACTGAATAACGGAGTGA  
CCGCAACAGATTTAGTTCTAACAGTGACCCAGATGCTTCGTAAGCACGGCGTCGT  
TGGAAGTTCGTAGAATTCTATGGCCCAGGAATGAGTGAGCTTGCGCTTGCGGAT  
CGTGCAACTATTGCCAACATGTCTCCTGAATACGGTGCAACCATGGGGTTCTTCCC  
TGTGGATCACGTAACCTCTCCAGTACTTGAAATTAACAGGGAGAAGCGATGAACT  
GTGGCTATGATAGAGTCTTATCTTCGGGCAAACAATATGTTTGTGGATTATAGCCA  
GTCTCAAATCGAAAGAGTTTACTCCTCTTATCTTGAGTTGAATCTTGAGGATGTGG  
AGCCTTGTGTTTCAGGACCTAAGAGACCGCATGATCGGGTTACGTTGAAGGAAAT  
GAAGTCAGATTGGCACTCTTGCTTGGACAACAAAGTTGGATTCAAGGGATTTCGT  
GTTCCAAAGGAATCTCAGAGTAAAGTCATAGACTTCTCATTCCATGGGACCCAG  
CTCAAATCAAACATGGCGATGTGGTCATAGCTGCAATCACCAGCTGCACGAACAC  
ATCAAACCTAGTGTGATGCTTGGTGCTGCCCTAGTTGCAAAGAAAGCCTGTGAA  
CTGGGTCTCGAGGTGAAACCATGGATAAAGACTAGTCTTGCTCCAGGTTCGGAG  
TTGCAACCAAGTACCTGGAAAAGAGTGGATTACAGAAGTACCTAAACCAGCTTG  
GATTCAATATCGTGGGTACGGATGCACGACCTGCATTGGAAACTCGGGTGACATT  
GATGAGTCTGTAGCCGCCGCAATTTCTGAAAACGATGTCGTTGCTGCCGCTGTGCT  
TTCCGGAAATAGAAATTTTCGAGGGGCGTGTTTCATCCTCTGACAAGAGCTAATTAC  
CTTGCTCTCCTCCCCTTGTGTTGGCATATGCTCTTGCCGGAACAGTCAACATTGA  
CTTTGAGACCGAACCCATCGGAACAGGAAAAGATGGGAAGAAAGTGTACTTCCG  
GGACATCTGGCCTTCAACCGAGGAGATCGCAAAGGTGGTGGAAATCTAGCGTTCTC  
CCAGAGATGTTCAAGGAAACGTACAAGGCAATAACAGAAGGAAACCCAATGTG  
GAACGAGCTCTCTGTACCAAGCAGCAAACTCTACTCGTGGGACGAAAAGTCAAC  
GTACATCCACGAGCCCCCATATTTCAAGGGTATGACCATGGACCCACCTGGGCCC

CACAGCGTGAAGAACGCCTACTGTTTACTTAACTTTGGAGACAGCATCACCACCG  
ACCACATCTCTCCCGCTGGAAACATCCAGAAAGACAGCCCCGCGCTAAGTATCT  
TCTAGAGAGACAAGTGGAGAGGAGAGATTTTAACTCGTATGGCAGCCGACGTGG  
CAACGACGAGATCATGGCCAGGGGTACTTTTGCAAATATCCGACTGGTGAATAAG  
CTCTTGAAGGGGGAGGTTGGGCCCCACACTGTCCATATCCCTTCTGGGGAGAAAC  
TCTCTGTGTTTGATGCCGCCATGAGATATAAGAGCGAGGGGCAGGACACAATTAT  
CCTGGCGGGGGCTGAGTATGGAAGCGGCAGCTCCCGGGATTGGGCTGCCAAGGG  
ACCTATGCTGCTGGGAGTGAAGGCGGTGATAGCAAAGAGTTTTGAGAGGATACA  
CAGAAGCAATCTGGTGGGGATGGGGATAATTCCCCTGTGCTCAAGACCGGGGA  
GGATGCCGAGACTCTGGGGTTGACCGGGGAGGAGAGATTCAACATCGGGCTGCC  
TAGTAGCGTGGCGGAGATCAGGCCTGGTCAGGATATTACCGTAACTACTGATACA  
GGGAAGTCCTTCACTTGCACCGTCCGATTGATACCGAGGTGGAGCTAGCCTACT  
TCAACAATGGCGGCATTCTCCCCTACGTGATCAGAAACCTGATCAAAGCCGACGG  
CTAA

### *LtIDH1*

ATGAGTTGGCTGTCCCTTAGCCACTCATCATACCAGACACTTCTGTTATCATACCC  
ACTCATCATACGAGTTCTCATCTCTGTTCTTGATCTGCTGCCGGCTGCTGTCTCTC  
AGATCTGCTCGCCATGGCTTTCGAGAAGATCAAGGTCGCCAATCCGATCGTTGAA  
ATGGACGGCGACGAGATGACTCGCGTTATCTGGGAGTTTATCAAGAGCAAGCTGA  
TTTTCCCTTCTTGATTTGGACATCAAGTACTTTGATCTTGCACTTTCTTACCGTG  
ATGCCACAGACGACAAAGTCACTGTTGAAAGCGCAAAAGCAACACTCAAATAC  
AATGTTGCCATCAAGTGCGCCACAATAACACCAGATGAGGCTCGTGTGAAGGAG  
TTCAACTTGAAATCTATGTGGAAGTGTCTTAATGCCACAATCCGGAACATCTTGAA  
TGGCACGGTGTTTAGAGAACCCATCATCTGCAAGAACGTTCTTGGCCTTGTTCTTG  
GATGGAGTAAGCCCATATGCATCGGAAGGCATGCCTTTGGAGATCAGTACCGGGC  
TACTGATGCAGTCATCAAAGGACCTGGAAAACCTGAAACTCGTATTTGAGGGCAA  
GGAGGAAGAGATAGAACTCCAAGTTTTCAACTTCACTGGGGAAGGAGGAGTAGC  
TCTGGCAATGTACAATACTGACGAGTCTATTGCTCATTGCGGAGGCATCAATGG  
CCACTGCTTATGCCAAGAGGTGGCCTCTTTATTTAAGCACCAAGAACAATTCTG  
AAGAAATACGACGGAAGGTTTAAGGACATATTCCAGGAGGTGTACGAGGCAGAG  
TGGAAGTCAAAGTTTGAAGCTGTGGGGATATGGTCGGTCAACTTATCTGCCACGT  
CATCAGAGTTCTATGAAATGAAGATTTTATTATTATTTTTTTATTTTTTATGA

### *Lt2OG-DH1*

ATGGCGTGGTTCAGAGCAGTGTGAGGGATGGCGAGGCATGCCGTGCGGAGGAAC  
CTCGTTCAGGGATGTCACCATGTAGCTAGGGCTCACCGTTGTCCTCTACGCTCCCG  
CGGCTTCCGTTGCACTTCTCTGAGGCCCAACGCCGCTCCGATTCCTCGTCCCGTGC  
CGCTTTCCAAGCTCACGGATAACTTCCTAGACGGCACGAGCAGCGTTTACCTCGA  
GGAATTGCAGAGAGCGTGGGAAGCCGACCCCGACAGCGTCGACGAATCATGGG  
ACAACCTTCTTCAGGAACTTCGTCGGCCACGCCGCTACATCGCCAGGAATCTCCGG  
CCAGACAATCCAGGAGAGCATGCGGCTGCTACTTCTTGTGTCAGAGCATACCAGGTA  
AACGGCCACATGATTTCCCAATTAGATCCTCTTGGGCTTCAGGAGCGCGAAATTC  
CAGAAGACCTCGATCCAGCCTTCTACGGATTCACTGAAGAAGATCTAGACAGAG

AATTCTTCATCGGAGTATGGAGAATGTCTGGGTTCTCTCCGAAAATCGCCCTGTT  
CAAACCTCTTCGATCCATTCTAGATCGCCTCAAACAAGCCTACTGCGGCAGCGTTG  
GATACGAATACATGCACATCGCCGACAGAGATCAATGCAACTGGTTGCGAGACAT  
GATCGAAACTGTAAACCTCGAGCCTACGGGAAGGATCGACAGGAAGTCATCCT  
AGATCGACTCATCTGGAGCACCCAATTTCGAGAATTTCTCTCGCTACAAAATGGGTA  
ACAGCGAAGAGATTTCGGCCTCGAAGGAGCGGAGACTCTGATTCCAGGGATGAAG  
GAGATGTTTCGATCGAGCTTCAGATCTCGGAGTAGAGAGCATCGTCGTTGGAATGC  
CTCACAGAGGTAGACTGAATGTTCTTGGGAACGTCTTCCGCAAACCACTTCGCCA  
AATTTTCAGCGAATTCAGCGGTACCGGCTCAAAAGCCATGGAAGAAGTTGGACTC  
TATACTGGAACCGGCGACGTGAAGTATCATCTGGGTACCTCCTATGATCGACCCAC  
TAGAGGAGGAAAGAGAATTCATCTCTCTCTGGTGGCAAACCTAGTCATCTTGAA  
GCTGTTGATCCAGTTGTTCTTGGGAAAACCTAGGGCAAACAGTATTACTCCAATG  
ACCTCGATCGGACCAAGAATTTGGCAGTTTTGATTACGGGAGATGGGAGTTTTGC  
CGGGCAGGGAGTGGTTTACGAGACTCTGCATCTCAGTGCTCTTCCCAACTACACC  
ACCGGTGGTACTATTCACATTGTGGTGAACAATCAGGTGGCGTTCACTACTGATCC  
GACCGCTGGGCGTTCATCTCAGTACTGTACTGACGTAGCAAAAGCTCTGAATGCT  
CCGATTTTTTCATGTTAATGGGGATGATATGGAGGCTGTGGTGCATGTATTTGAGCTT  
CGGGCTGAGTGGCGGCAGACGTTTCATAAAGATGTGGTTGTTGATGTGGTATGTTA  
CCGCCGATTTGGGCATAATGAGATGGATGAACCCTCTTTCACGCAACCGAAGATG  
TACCAGGTGATTCGTAGTCACCCAAGTGCTCTTCAAGTGTACCAGAAGAAATTGG  
TAGAATCGGCCCCGCATCACCAAAGAGGAGATTGATGGGATACACCGTAAGGTTAG  
TTCCATTTTGAATGAAGAGTACAACAGCAGCAAGGACTGCATTCCGAAGAGAAG  
AGACTGGCTCTCGGCATATTGGGCGGGTTTTAAATCCCCGGAGCAGATATCAAGG  
ATCCGCAATACTGGGGTTAAGCCTGAGATTCTGAAGCGCGTGGGGGAAGCTATAA  
CTTCTCTGCCGGAGAAGTTTAAGGCTCATAAAGTGTTGAAGAGGATTTTTGAGGA  
GCGATCTCAGATGATTACAGACAGGGGAAGGCGTTGACTGGGCGGTGCGGAGGC  
GCTTGCCTTTGCTACACTCCTGGTGGAGGGTAATCACGTTAGATTGAGTGGACAA  
GACGTTGAAAGAGGAACCTTTCAGCCACCGACATTCTATCATCCACGATCAAGAGA  
CGGGGGAAATATACTGCCCCGCTGGACCATGTTATGATGAATCAGAACGAGGAGAT  
GTTTACCGTCAGCAACAGCTCATTGTCTGAATTTGGGGTTCTGGGGTTTGAGCTCG  
GGTACTCCATGGAAAACCCTAATTCTCTAGTGCTCTGGGAAGCCCAATTTGGGGAT  
TTTGCCAACGGTGCCCAAGTGATTTTTGACCAGTTTTTGAGTAGCGGGGAGTCGA  
AATGGCTAAGGCAAACCGGCCTTGTTGTGTTGCTTCCACATGGGTATGATGGCCA  
AGGCCCTGAACACTCTTCTGCGAGATTGGAGCGTTTTCTGCAGATGAGCGATGAT  
AATCCTTACGTGATCCCTGAGATGGAGCCCACCATGAGGAAACAGATACAAGAG  
TGCAATTGGCAAGTAGTCAACGTTACAACACCGGCTAATTACTTCCATGTACTGCG  
GCGCCAGATCCACAGAGAATTCAGGAAACCACTGATTGTAATGGCTCCGAAGAA  
TCTTCTGAGGCACCCCAGGTGCAAGTCAAACCTCTCAGAATTCGATGACGTTCAA  
GGTCATCTGGGTTTTGACAAACAAGGAACTCGGTTCAAACGCCTCATCAAGGAC  
CAAAGTGACCACTCTGATCTCGAAGAGGGCATCAGGCGTCTGGTCCTCTGCTCCG  
GAAAAGTTTATTATGATCTTGATGAAGAGAGGAAAGTGGCAGAGGCCAAGGATG  
TGGCGATCTGTAGAGTGGAGCAGCTCTGCCCCTTCCCTTATGACCTTGTCCAGCGG  
GAGCTCAAACGATATCCTAATGCGGAAGTGGTGTGGTGTGTCAGGAAGAACCGATG  
AACATGGGAGCATATTATTACATTAACCCTCGCCTCTCCACCGCCATGTCAGCTCT

TGGCAGGTCCTCAGTCAAAACTGTCAAATACGTTGGCCGGCCGCCATCAGCCTCC  
ACCGCCACTGGCTTCCTCGGAGTCCATCAGAAAGAGCAGAAGGACCTTGTCCAC  
AAGGCCATCGGCCCTGATCCCATCACATTCCCTCACTAA

### *LtSDH1*

ATGGAGGATGGAACCCTTCACAGGTTCCGTGCGGCCAATACAATTCTAGCCACAG  
GGGGCTATGGCAGAGCCTACTTTTCCGCAACTTCTGCTCACACCTGCACCGGAGA  
TGGGAATGCCATGGTTTCTCGTGCTGGTCTACCTCTTCAGGATCTTGAGTTTGTACA  
GTTCCACCCGACGGGAATATATGGGGCTGGGTGCCTGATTACGGAAGGATCTCGT  
GGGGAAGGTGGTATTCTCAGGAATAGCGAAGGGGAGCGGTTTATGGAAAGATAT  
GCTCCTACGGCCAAAGATCTTGCATCAAGAGACGTTGTTTCGAGATCCATGACTAT  
GGAAATAAGAGAAGGCCGTGGTGTAGGACCACTGAAGGATCACATATATCTTCAT  
CTTAATCACTTGCCGCCGGATGTGCTGAAGGAAAGACTGCCAGGCATATCTGAAA  
CTGCCGCCATCTTCGCTGGAGTTAATGTAACCAAGGAGCCGATTCCCGTTCTACCA  
ACTGTACACTATAACATGGGTGGTATTCTACTAATTACCATGGGGAGGTTGTTTCAT  
GTCAATGGAGACGACGCCAACGCCGTAGTTCTTGGTCTAATGGCAGCTGGTGAGG  
CAGCTTGTGCATCAGTTCATGGCGCAAACAGGCTTGGTGCAAACCTCTTTGCTGGA  
CATCGTTGTCTTTGGTCGAGCCTGTGCGAACAGAGTTGCAGAAATATCCAAACCA  
GGCGACAAGCTGAAACCTCTTGAAAGGACTGCGGGAGAGAAGACCATTGCCTGG  
TTAGATAAGCTGCGGAATGCTAATGGTTCACTAACCCTTCAAAAATCAGGCTTA  
ACATGCAACGGGTGATGCAAAATAATGCCGCTGTTTTCCGCACTCAGGAGACTCT  
TGAAGAAGGTTGTAAGTTAATCAATCAAGCTTGGGAGAGTTTCCAGGACGTCCAG  
ATCCGTGATCGAAGTCTCATATGGAATTCGGACTTAATTGAGACCATAGAGTTGGA  
AAACCTTCTCATCAATGCGTGTATTACCATGCATTCTGCCGAGGCAAGGAAAGAA  
AGTAGAGGCGCTCATGCCCCGCAAGACTTCACTAAAAGAGACGACGAGAAATGG  
ATGAAGCATTCTCTGGGGTACTGGGAAGATGAGAAGGTTGACTGGACTATAGGC  
CAGTCCATATGGATACCTTGATGATGAAATCGAGTCATTCCCGCCAAAGGCACG  
CGTTTACTGA

### *LtFUM1*

ATGGGGATGCTAGCAGCGTCGCGTCGGATTTTCATGTCCGATGAACAGTGGAGTAT  
CTATGCTAGCTGGAATTCTTCAATCAGCGTACGTAAGGTCGATTTCTCCTCGGCGTTC  
AGGGAGGAAAGGGACACGTTTCGGGCCTATACAAGTGCCGGCGGACAGGTTATGG  
GGAGCTCAAACCTCAAAGATCGCTGCAAACTTTGACATCGGTGGTCAATGCGAG  
CAGATGCCGTTGCCAATCATTTCGTGCATTGTCATTCTGAAGAAATGCGCCGCAA  
AGGTGAATATGGAATATGGTCTTGATCCGATTATCGGAAAAGCGATAATCCAAGCT  
GCCCAAGAGGTGGCTGAAGGAAAGCTCAATGATCATTTTCCTCTAGTGATTTGGC  
AAACCGGCAGCGGGACCCAGAGCAACATGAATGCCAATGAGGTGATAGCCAATC  
GGGCGGCAGAGATTCTAGGGCATAAACGCGGAGAGAAGCTTGTGCATCCAAATG  
ATCATGTCAACAGATCACAGTCCTCAAACGACACATTTCCAACCTGTAATGCATATT  
GCGGCTGTATTAGAGATAAAAAATATTCTGCTCCCTGGTTTATCGGGATTGCACTCT  
GCCCTCTTTCAGAAGTCTCATGAGTTTAGAGATATCATCAAGATAGGGCGCACGC  
ATACACAAGATGCCACTCCCTTAACTCTTGGGCAGGAGTTTAGTGGCTATTGTACT  
CAGGTAGAGTATGGAATCGACAGAGTATCAGGTACTTTGCCTCACATGTATCAGCT



GGCCCAGGGTGGAAGTGCCGTAGGAACTGGTTTGAACACCAAGAAAGGATTGGA  
TGTGAAGATTGCTGCTGCAGTGGCAGAAGAACTAGTCTGCCATTTGTCACGGCA  
GAGAACAAATTCGAAGCGTTGGCTGCTCATGACGCTTTCGTGGAAACCAAGTGGG  
GCATTGAACACCGTCTCTGCTTCCTTAATAAAGATCGCGAACGACATACGGCTTCT  
AGGAAGTGGTCCTCGCTGTGGACTAGGAGAACTCATTCTCCCCGAAAATGAACC  
AGGCAGTAGTATCATGCCAGGCAAAGTAAACCCAACACAGTGTGAAGCTCTCAC  
GATGGTCTGTTGTCAGGTAATGGGTAATCATGTGGCCATAACTATTGGTGGGTCTA  
ATGGGCACTTCGAGCTGAATGTCTACAAGCCGCTCATCGCCAGTAACTTGATCCG  
ATCGGTGAGGTTGCTAGGCGATGCAGCGTCGTCCTTTGAGAAGAACTGTGTGAGC  
GGTATTCGGGCTAACAAATCAGAGGATTCGAAGCTGTTGCATGAGTCCTTGATGCT  
GGTCACCTCCTTGAATCCTAAAATCGGCTATGACAAGGCTGCTGCAGTAGCTAAG  
AAAGCTCACAGGGAGGGTACTACCCTGAAGGATGCTGCACTCGGCCTTCAAGTC  
CTCACCGCTCAAGAATTCGATGAGCTAGTGGTCCCAGAGAAGATGATTGGCCCCCT  
CTGACTGA

### *LtMDH1*

ATGATCAAGAGGCGCTTCTACAAGTTGGAGCATTCCGCTCGCGACGGTTCTTCGT  
CCTCGTCTTCGGAGTCTGAAGACGAAGTGGGAGAACGAGAGGAGGAGTCGCATG  
GTGAAGAAGAGGTGCGAGGATAAGGAAGTGAAGTCTGCTGAAAAATGGCGGAAGCAG  
TTCTCTGTGTCTGACGACGCTTCATCTGGGTCTGGTTATGAGAGCGAGGAGAGCTC  
ACGGAATGACATCAGTTGTGACGCTACAGGCTTACCACTTAATGATAACGACGAT  
GACGAACGACATCAAGGTCAAACCTAAAAATGAGGGCAAAATCAATGGCTCGGA  
AGATCAAAGCCAGTCTGAGATGGATTACTACGTGCTGAAGCACAAGTCTGTATTCT  
AAGTGTAGGATCTGCCCTAGAATCATCTGCTTATCTGAGAACACCCTTCTGGAACA  
TCTTAAATCCAAGAGACATGCCAGATCTAAGAAGTTATTGAAGGAGGGAAGACTC  
AAGCTGATGCTGAACAGCGATGGAGAGATTGAAGAGGATCAAGAGACCCACGC  
CGAAAGGCACGCCAGGACTATCGCTCTCGCTCAGGTTCCCATTTATTGTGTTAAAA  
GTAATGATTATTTAATTTAG

### *LtCS1*

ATGGTGTTTCATGCGGAGTGTTTTGGTACTTTCCAAGATCCGATCCCGCCTGGTGCA  
ACAATCGGCGACTTTAGGCTCTGTCAGATGGCTTCAGATCCAGAGTTCTTCTGATC  
TAGATATTCGTGCGCAATTGAAGGATCTTATTCCAGAGCAACAGGAGCGCTTGAA  
GAAATTGAAATCAGAGCACGGTAAAGTTGAGTTAGGAAAGATCACTCTTGACATG  
GTAATTGGTGAATGCGAGGAATGACTGGATTGCTGTGGGAACTTCGTTGCTTG  
ATCCTGAAGAGGGAATCCGTTTTAGAGGTCTTTCTATTCTGAATGTCAGAAAGTG  
CTGCCTGCTGCAGTTCCTGGTGGTGAACCATGCCCCGAAGGCCTTCTGTGGCTTCT  
TTTGACCGGAAAGGTTCCCTAATAAGGATCAAGTCATTTCTTTATCCAAGGAGCTGC  
AAGCACGTTCTTCAGTTCCAGATTATGTTTACAAGACTATTGATGCACTCCCTATAA  
CCTCTCATCCAATGACACAGTTTGCATCTGGTGTGTCATGGCACTTCAGGTTGAAAGC  
GAATTTGAGAAGGCATACGAGAAAGGAATATCAAAAACAAAGTATTGGGAGCCG  
ACCTTTGAAGATTCTCTTAACCTGATAGCCCGACTTCCTGCAGTGGCAGCTTATGT  
CTATAGAAGAATATACAAAAATGGACAGATCATACCTGCTGATGAATCATTGGACT  
ATGGCGGAAATTTCTCCACATGCTTGGGTTTGATGATCCAGAAATGCTGGAGCTG

ATGAGACTATATGTTACTATCCACAGTGATCATGAAGGGGGTAATGTTAGCGCCCA  
TACTGCTCATCTGGTTGGGAGTGCACCTTTCAGACCCATATCTTTCATTTGCAGCTGC  
ATTAAATGGTTTAGCAGGCCCCGCTTCACGGGTGGCTAATCAGGAAGTACTGCTAT  
GGATCAAATCTGTCGTAGAAGAATGTGGGGAGAACATTACAACCGACCAACTGA  
AGGAGTATGTGTGGAAGACCTTAAACAGTGGCAAGGTTGTTCCCGGATACGGTCA  
CGGTGTTCTTCGCAAAACAGATCCAAGATACGTGTGCCAAAGGGAGTTTGCTCTC  
AAGTACTTGCCAGATGACCCACTATTCAAGCTGGTCTCAAAGGTTTACGATGTTGT  
TCCCCAATACTCACTGAACTTGGCAAGGTTAAAAACCCGTGGCCAAATGTAGAT  
GCTCACAGTGGAGTCTTGTTGAATTACTTCGGCTTGTCGGAAGCTAGGTACTTCAC  
CGTTCTCTTTGGTGTCTCGAGAAGCATTGGCATTGCTCCCAGCTGATATGGGACC  
GGGCGTTAGGACTGCCACTTGAACGCCCTAAGAGTGTGACGATGGATTGGGTGG  
AAAGCTTCTGCAAGAAGGCTGCTTGA
